# Supplementary material for: Synthesis and evaluation of photoaffinity labeling reagents for identifying binding sites of sulfated neurosteroids on NMDA and GABAA receptors
Source: PubMed Central journal article supplement (PMC11559520; doi:10.1039/d4ra07074g), 2024-11-13

Supplemental Information

**Synthesis and evaluation of photoaffinity labeling reagents for identifying binding sites of sulfated neurosteroids on NMDA and GABA<sub>A</sub> receptors.**

Mingxing Qian,<sup>a</sup> Yuanjian Xu,<sup>a</sup> Hong-Jin Shu,<sup>b</sup> Zi-Wei Chen,<sup>c,d</sup> Lei Wang,<sup>ce,f</sup> Charles F.

Zorumski,<sup>bd</sup> Alex S. Evers,<sup>acd</sup> Steven Mennerick,<sup>bd</sup> Douglas F. Covey<sup>\*abcd</sup>

<sup>a</sup>*Department of Developmental Biology, Washington University in St. Louis, 660 S. Euclid Ave., St. Louis, MO, 63110, USA*

<sup>b</sup>*Department of Psychiatry, Washington University in St. Louis, 660 S. Euclid Ave., St. Louis, MO, 63110, USA*

<sup>c</sup>*Department of Anesthesiology, Washington University in St. Louis, 660 S. Euclid Ave., St. Louis, MO, 63110, USA*

<sup>d</sup>*Taylor Family Institute for Innovative Psychiatric Research, Washington University in St. Louis, 660 S. Euclid Ave., St. Louis, MO, 63110, USA*

<sup>e</sup>*Department of Anesthesiology, Union Hospital, Tongji Medical College, Huazhong University of Science and Technology, Wuhan, 430022, China*

<sup>f</sup>*Key Laboratory of Anesthesiology and Resuscitation (Huazhong University of Science and Technology), Ministry of Education, China*

**Table of Contents**

|                                                                                                                                      |         |
|--------------------------------------------------------------------------------------------------------------------------------------|---------|
| <sup>1</sup> H NMR (400 MHz) spectra for compounds <b>KK238, YX33, MQ189, MQ231, MQ234, MQ235, MQ236, MQ237, MQ271, MQ273</b> .....  | S2-S11  |
| <sup>13</sup> C NMR (100 MHz) spectra for compounds <b>KK238, YX33, MQ189, MQ231, MQ234, MQ235, MQ236, MQ237, MQ271, MQ273</b> ..... | S12-S21 |

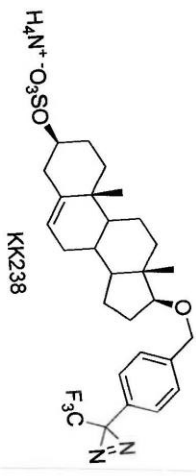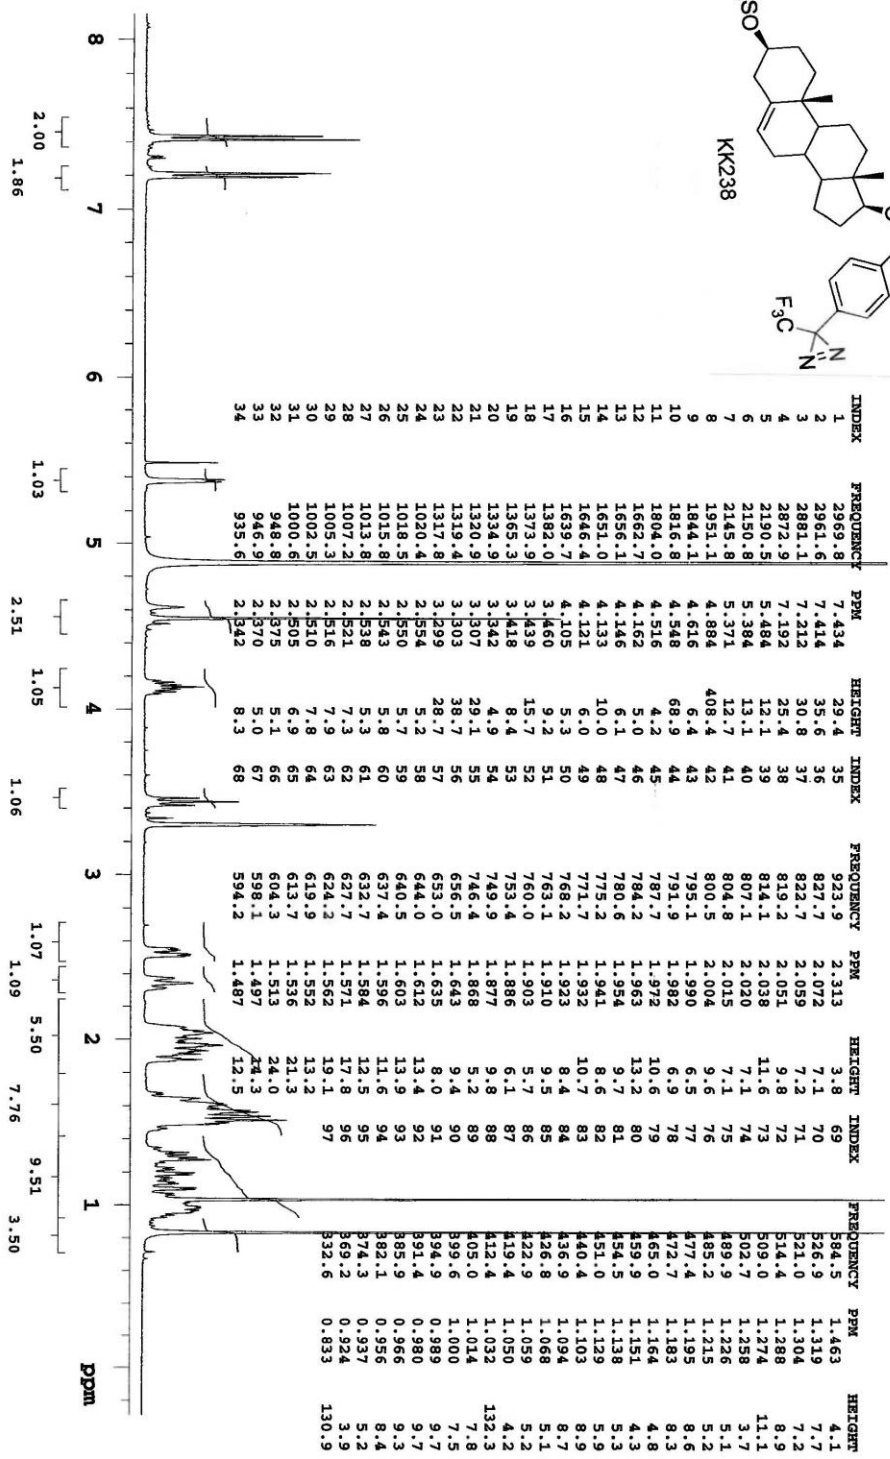

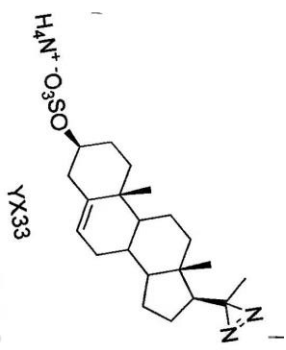

8m 7  
Cm 51

$C_{21}H_{35}N_2O_4S$

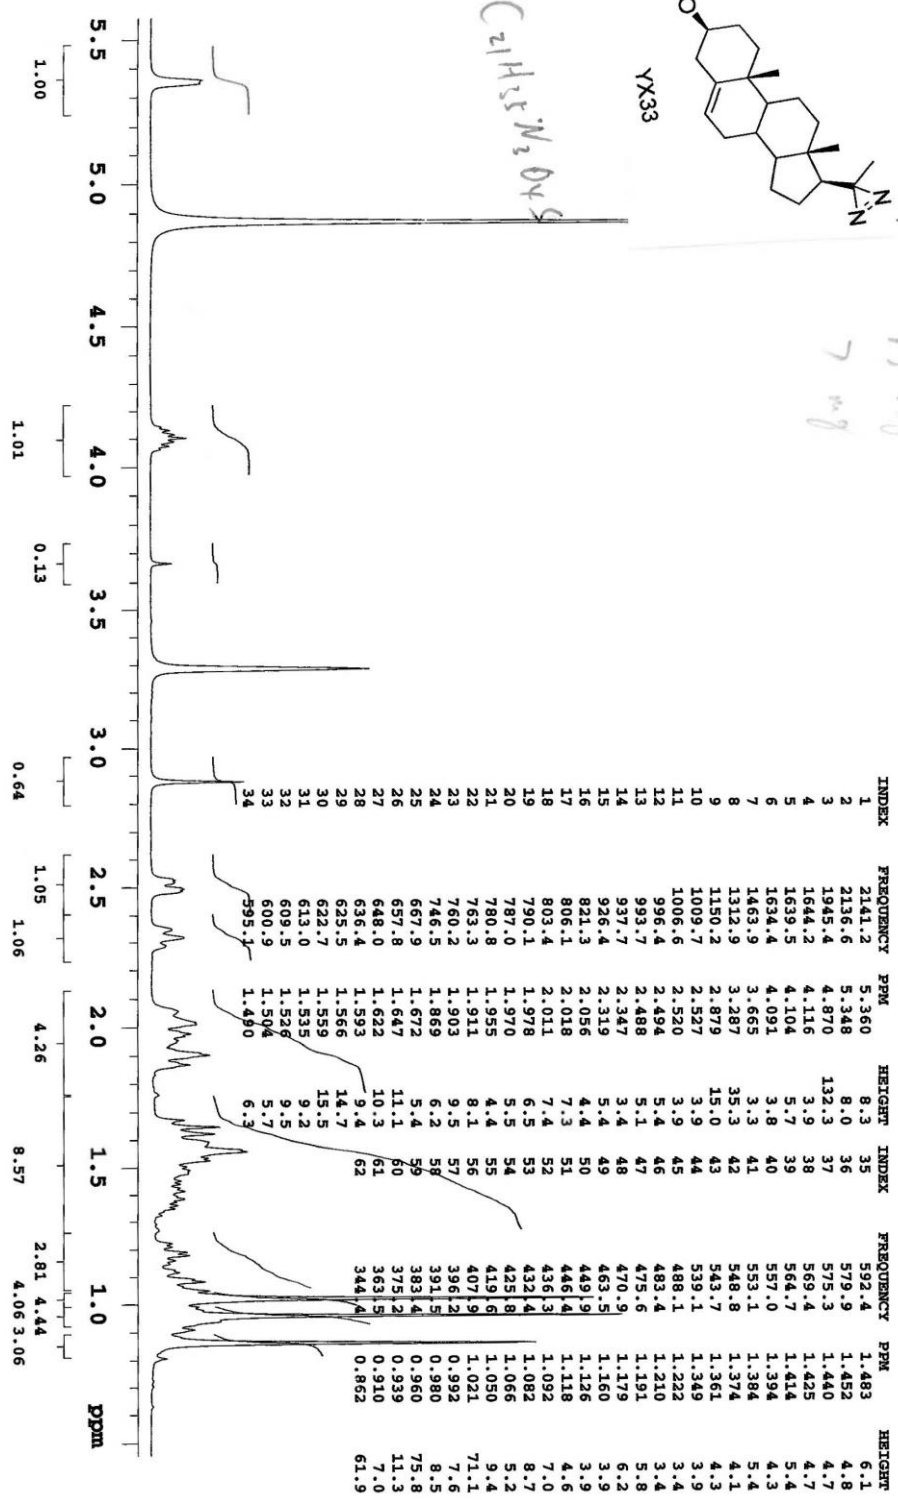

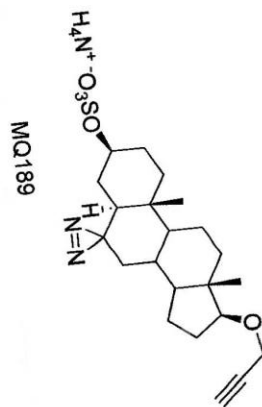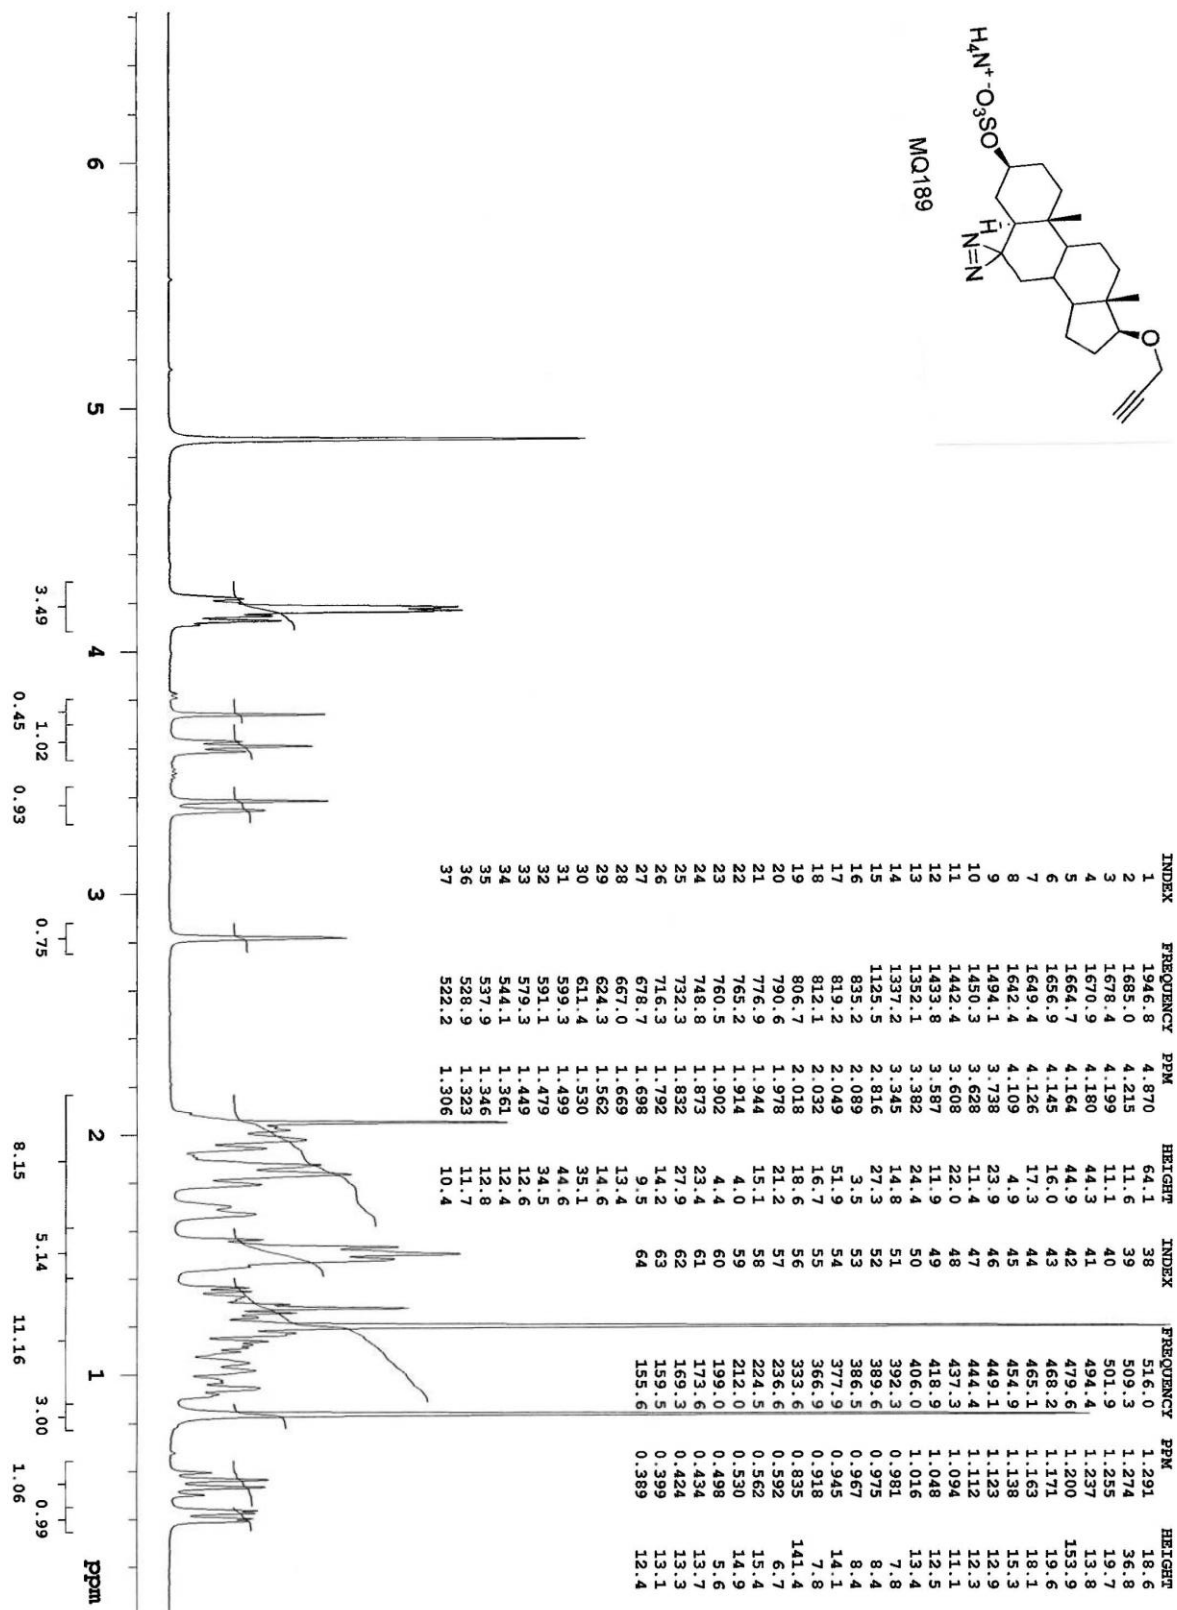

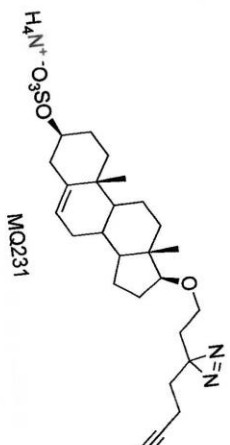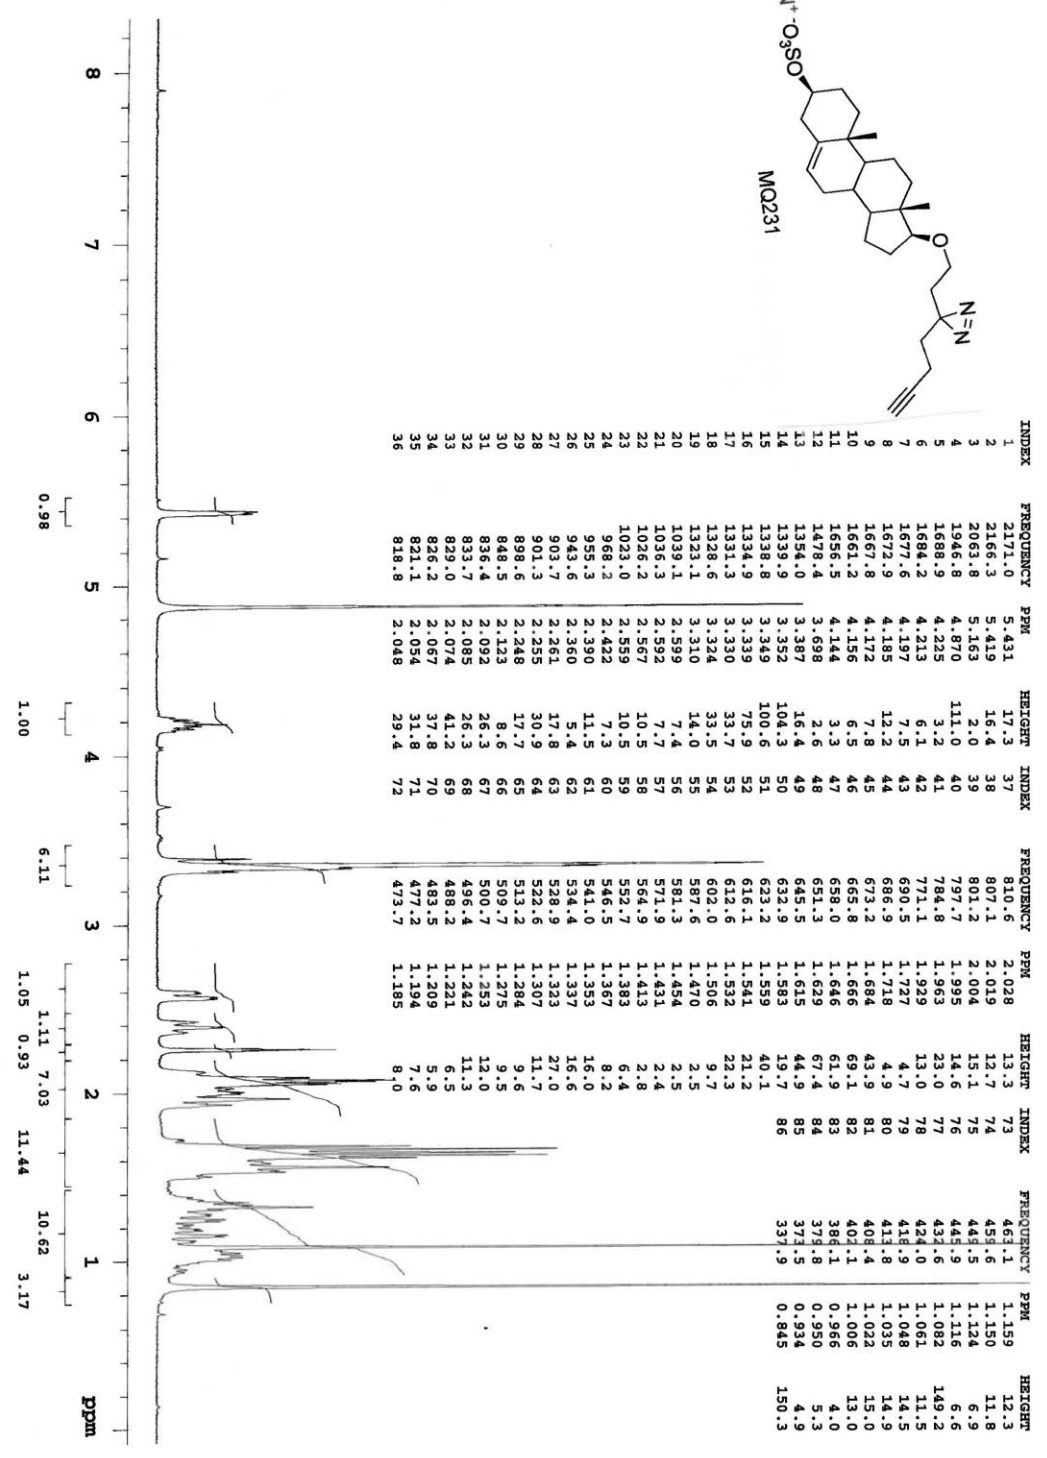

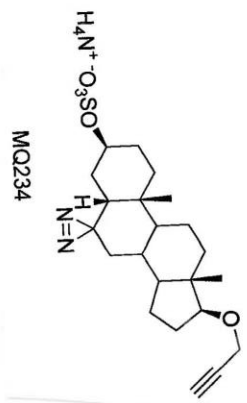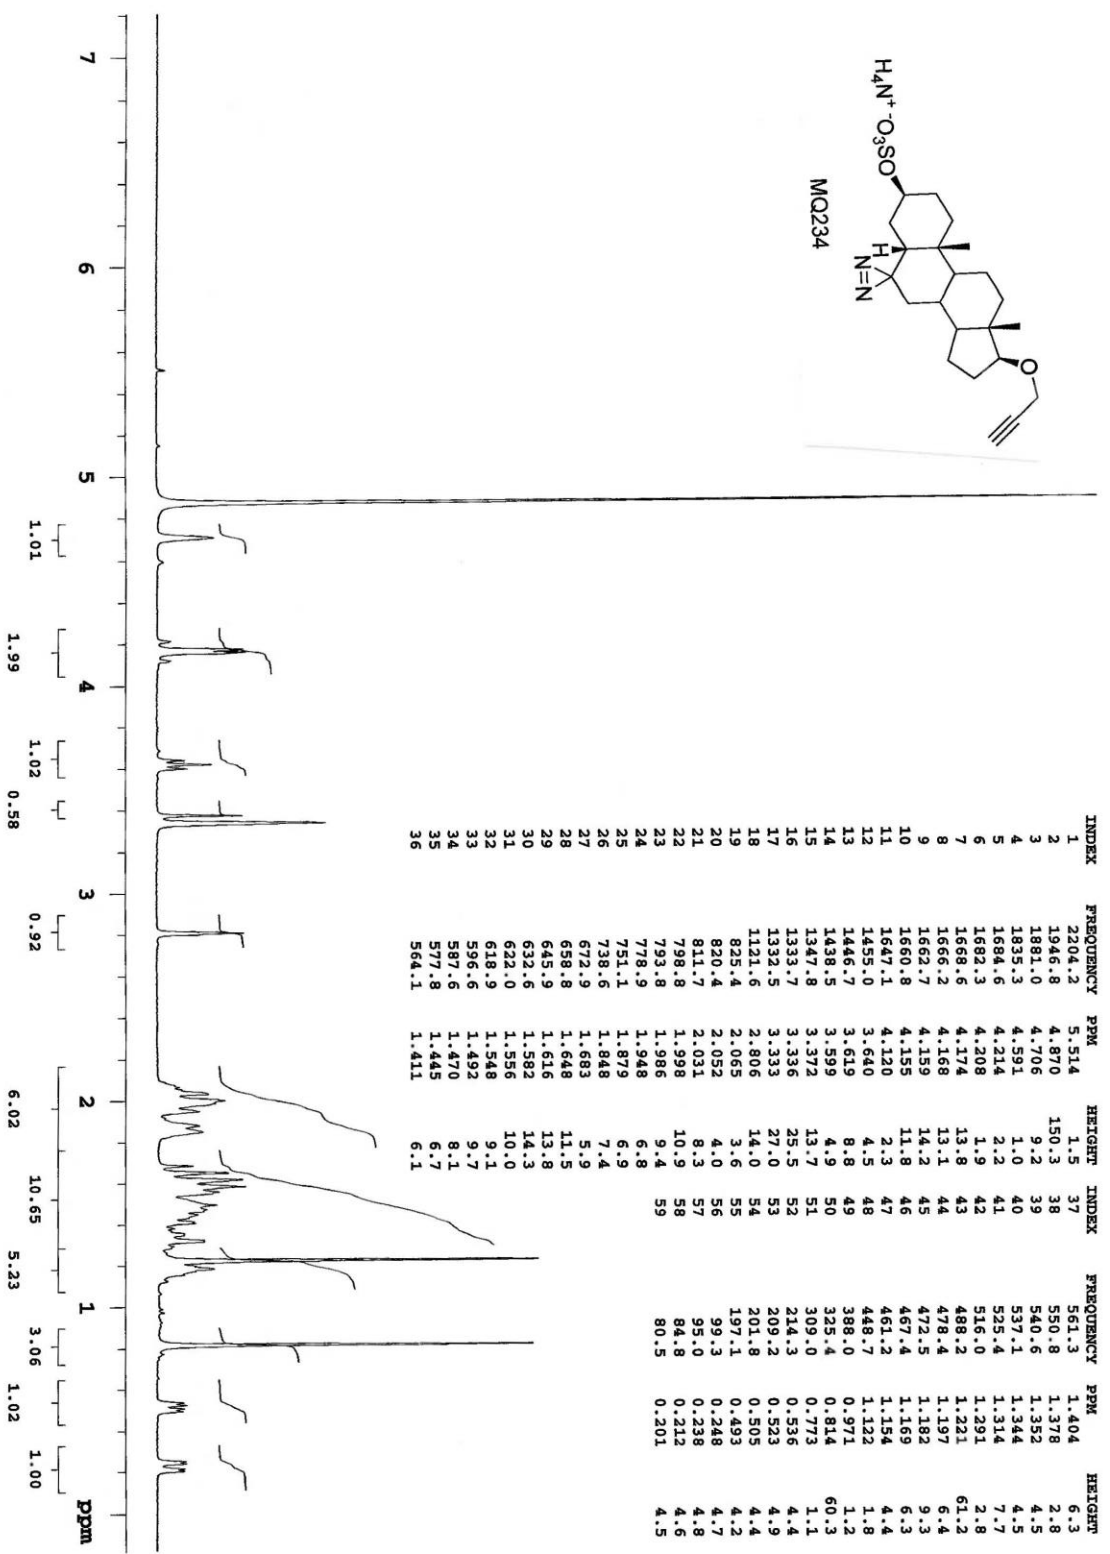

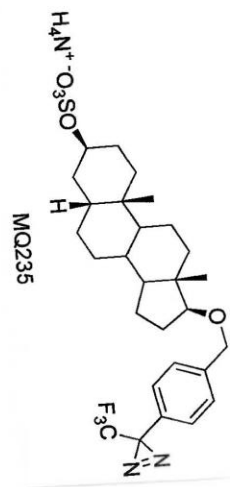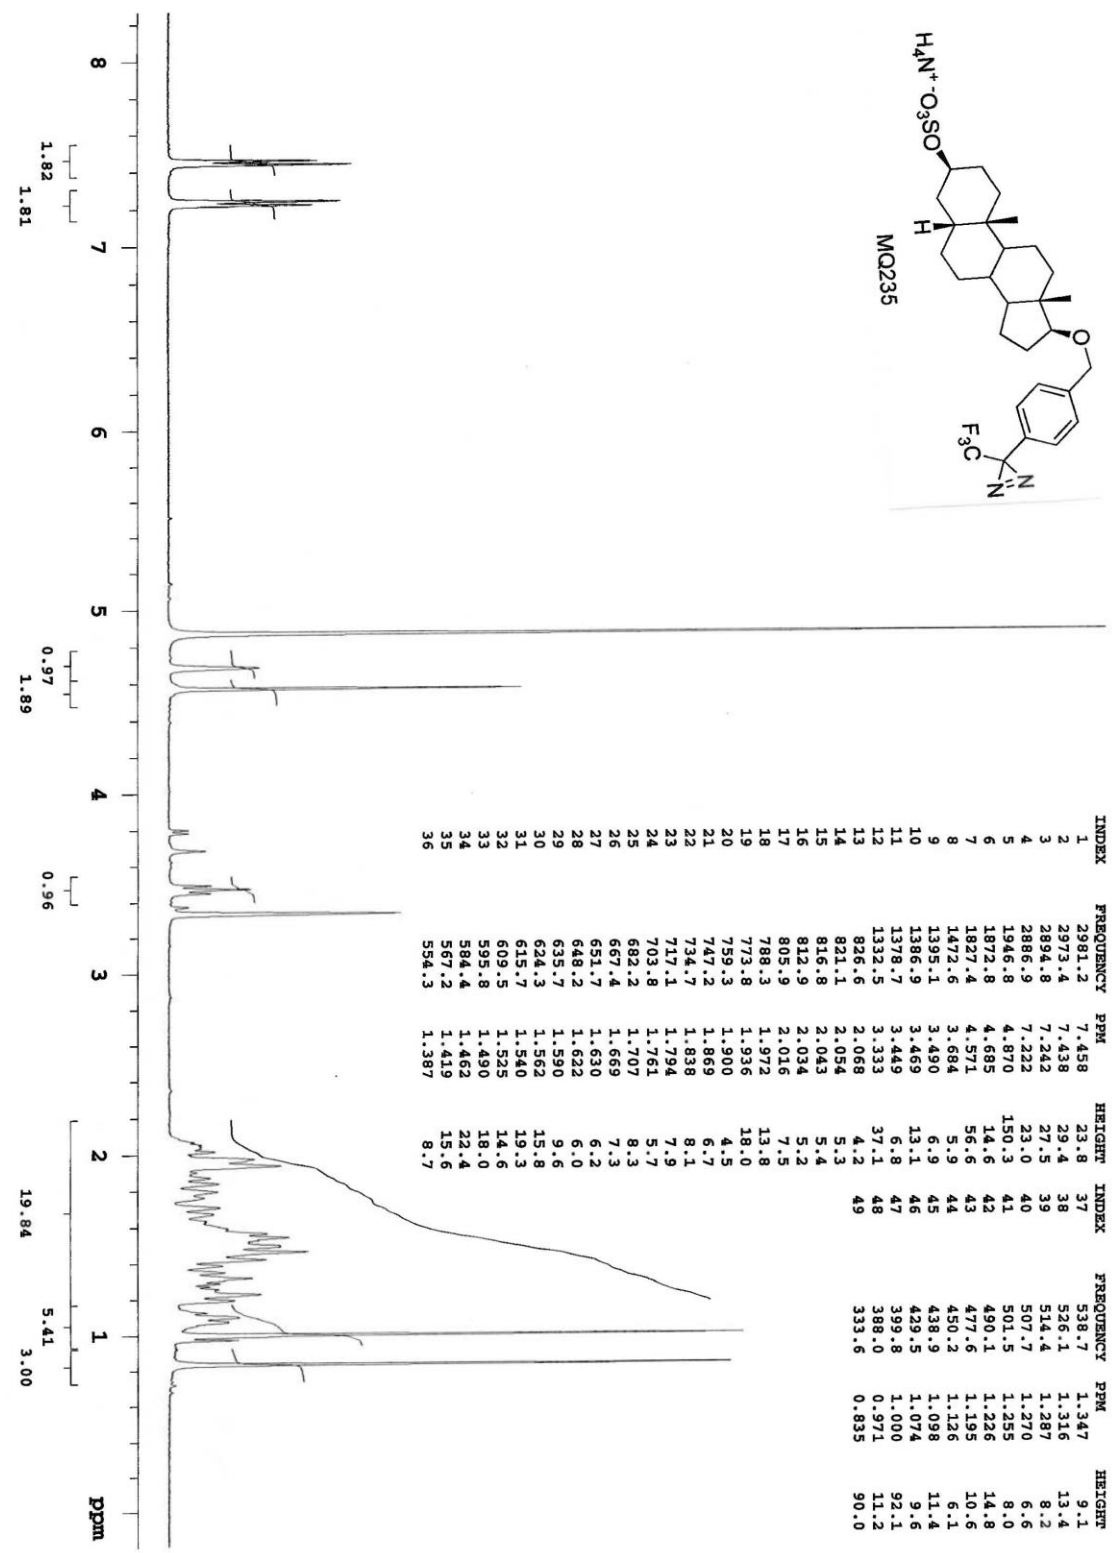

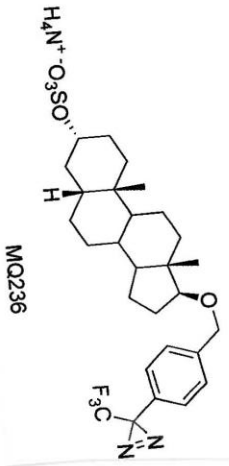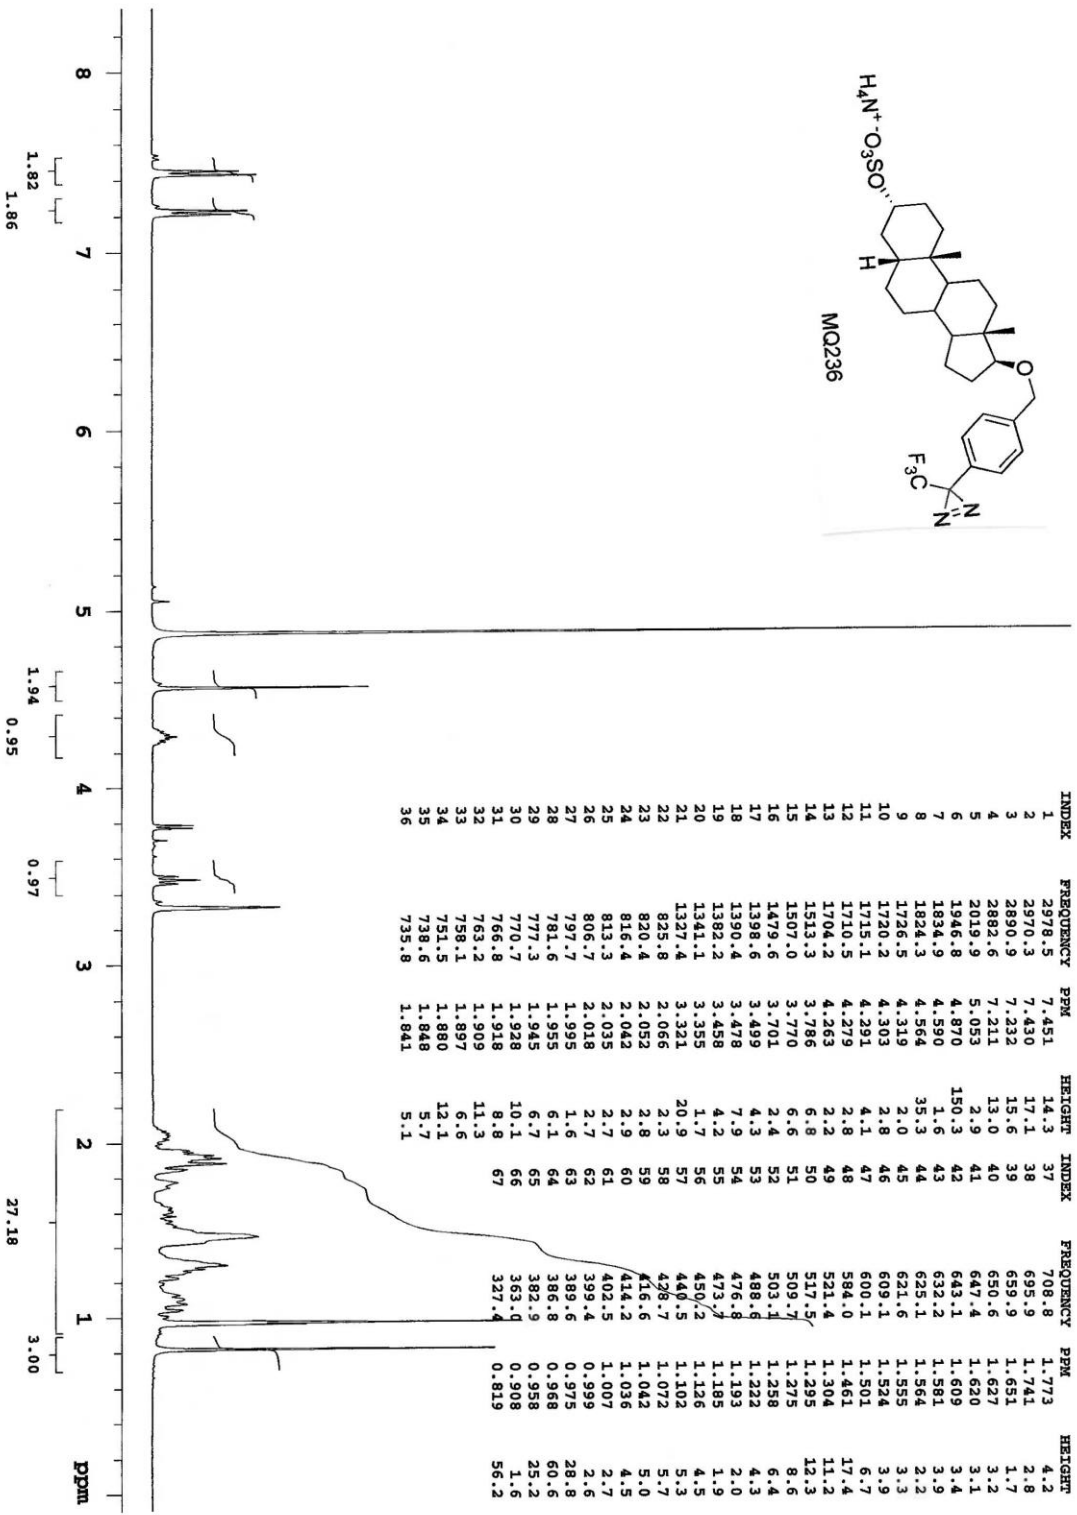



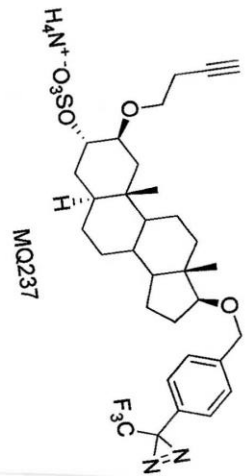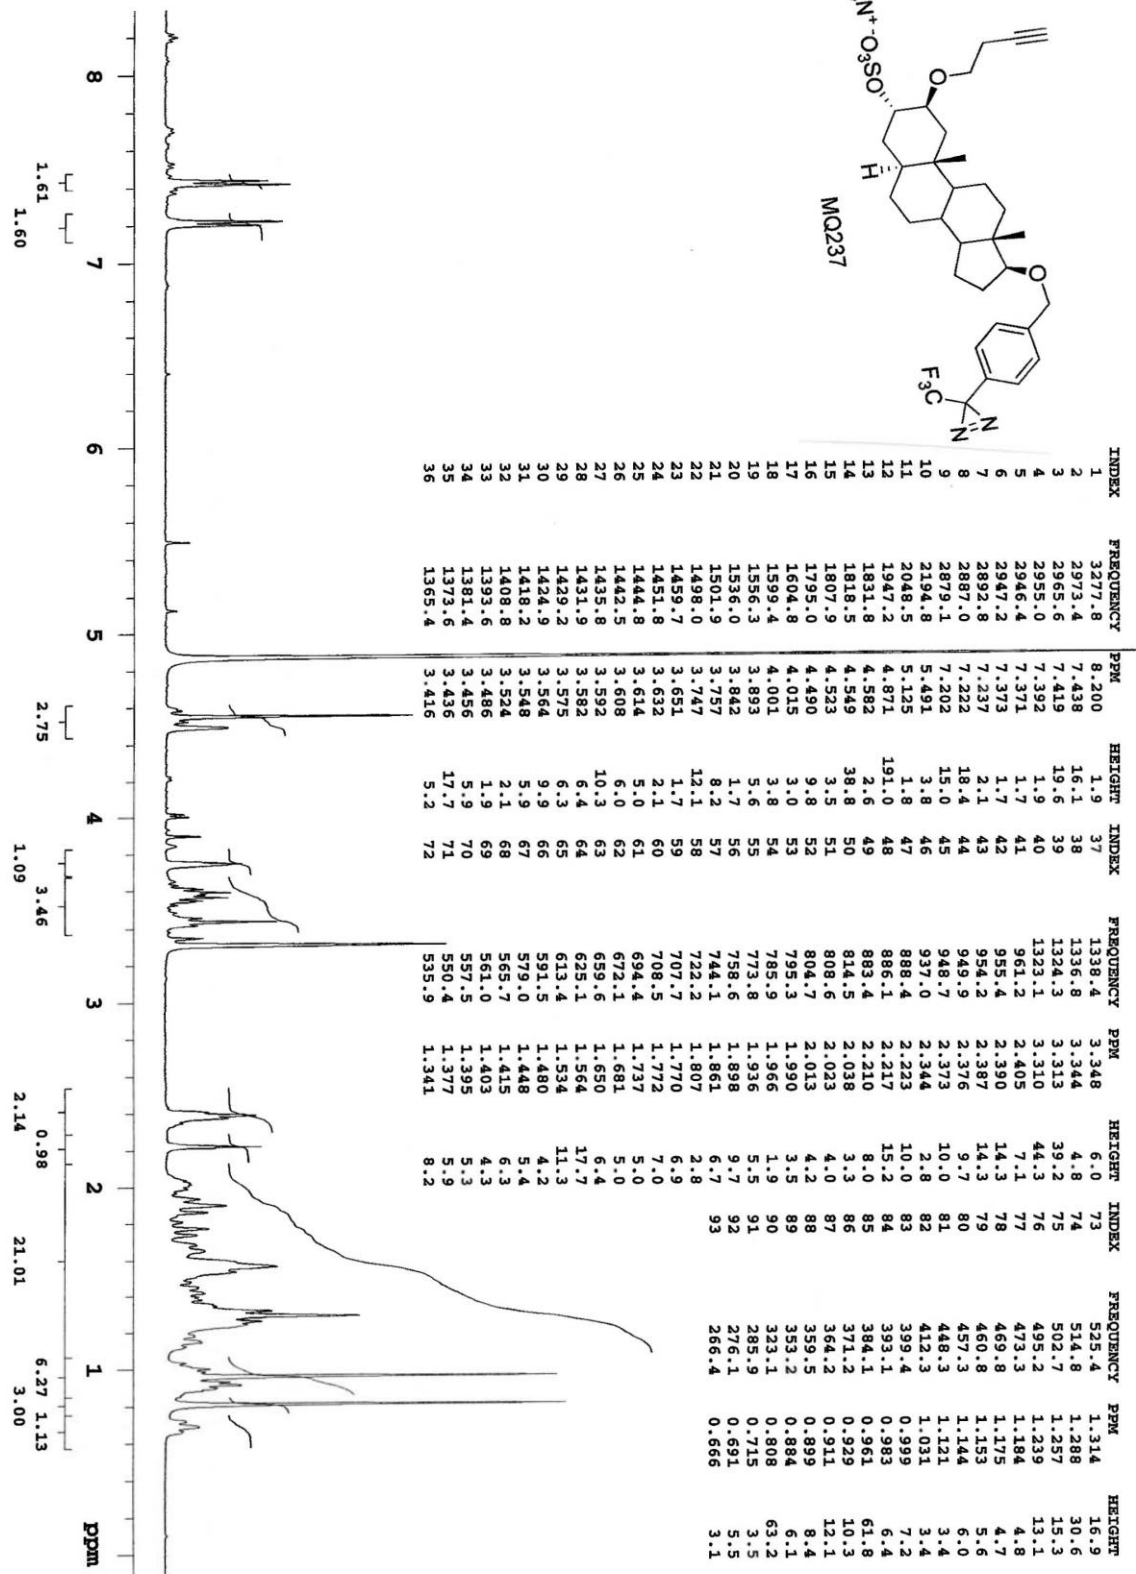

| INDEX | FREQUENCY | PPM   | HEIGHT | INDEX | FREQUENCY | PPM   | HEIGHT | INDEX | FREQUENCY | PPM   | HEIGHT |
|-------|-----------|-------|--------|-------|-----------|-------|--------|-------|-----------|-------|--------|
| 1     | 3277.8    | 8.200 | 1.9    | 37    | 1338.4    | 3.348 | 6.0    | 73    | 525.4     | 1.314 | 16.9   |
| 2     | 2973.4    | 7.438 | 16.1   | 38    | 1336.8    | 3.344 | 4.8    | 74    | 514.8     | 1.288 | 30.6   |
| 3     | 2965.6    | 7.419 | 19.6   | 39    | 1324.3    | 3.313 | 39.2   | 75    | 502.7     | 1.257 | 15.3   |
| 4     | 2955.0    | 7.392 | 1.9    | 40    | 1323.1    | 3.310 | 44.3   | 76    | 495.2     | 1.239 | 13.1   |
| 5     | 2946.4    | 7.371 | 1.7    | 41    | 961.2     | 2.405 | 7.1    | 77    | 473.3     | 1.184 | 4.8    |
| 6     | 2947.2    | 7.373 | 1.7    | 42    | 955.4     | 2.390 | 14.3   | 78    | 469.8     | 1.175 | 4.7    |
| 7     | 2892.8    | 7.237 | 2.1    | 43    | 954.2     | 2.387 | 14.3   | 79    | 460.8     | 1.155 | 5.6    |
| 8     | 2887.0    | 7.222 | 18.4   | 44    | 949.9     | 2.376 | 9.7    | 80    | 457.3     | 1.144 | 6.0    |
| 9     | 2879.1    | 7.202 | 15.0   | 45    | 948.7     | 2.373 | 10.0   | 81    | 448.3     | 1.121 | 3.4    |
| 10    | 2194.8    | 5.491 | 3.8    | 46    | 937.0     | 2.344 | 2.8    | 82    | 412.3     | 1.031 | 3.4    |
| 11    | 2048.5    | 5.125 | 1.8    | 47    | 888.4     | 2.223 | 10.0   | 83    | 399.4     | 0.999 | 7.2    |
| 12    | 1947.2    | 4.871 | 191.0  | 48    | 886.1     | 2.217 | 15.2   | 84    | 393.1     | 0.983 | 6.4    |
| 13    | 1831.8    | 4.582 | 2.6    | 49    | 883.4     | 2.210 | 8.0    | 85    | 384.1     | 0.961 | 61.8   |
| 14    | 1818.5    | 4.549 | 38.8   | 50    | 814.5     | 2.038 | 3.3    | 86    | 371.2     | 0.929 | 10.3   |
| 15    | 1807.9    | 4.523 | 3.5    | 51    | 808.6     | 2.023 | 4.0    | 87    | 364.2     | 0.911 | 12.1   |
| 16    | 1795.0    | 4.490 | 9.8    | 52    | 804.7     | 2.013 | 4.2    | 88    | 359.5     | 0.899 | 8.4    |
| 17    | 1604.8    | 4.015 | 3.0    | 53    | 795.3     | 1.990 | 3.5    | 89    | 353.2     | 0.884 | 6.1    |
| 18    | 1599.4    | 4.001 | 3.8    | 54    | 785.9     | 1.966 | 1.9    | 90    | 323.1     | 0.808 | 63.2   |
| 19    | 1556.3    | 3.893 | 5.6    | 55    | 773.8     | 1.936 | 5.5    | 91    | 285.9     | 0.715 | 3.5    |
| 20    | 1536.0    | 3.842 | 1.7    | 56    | 758.6     | 1.898 | 9.7    | 92    | 276.1     | 0.691 | 5.5    |
| 21    | 1501.9    | 3.757 | 8.2    | 57    | 744.1     | 1.861 | 6.7    | 93    | 266.4     | 0.666 | 3.1    |
| 22    | 1498.0    | 3.747 | 12.1   | 58    | 722.2     | 1.807 | 2.8    |       |           |       |        |
| 23    | 1459.7    | 3.651 | 1.7    | 59    | 707.7     | 1.770 | 6.9    |       |           |       |        |
| 24    | 1451.8    | 3.632 | 2.1    | 60    | 708.5     | 1.772 | 7.0    |       |           |       |        |
| 25    | 1444.8    | 3.614 | 5.0    | 61    | 694.4     | 1.737 | 5.0    |       |           |       |        |
| 26    | 1442.5    | 3.608 | 6.0    | 62    | 672.1     | 1.681 | 5.0    |       |           |       |        |
| 27    | 1435.8    | 3.592 | 10.3   | 63    | 659.6     | 1.650 | 6.4    |       |           |       |        |
| 28    | 1431.9    | 3.582 | 6.4    | 64    | 625.1     | 1.564 | 17.7   |       |           |       |        |
| 29    | 1429.2    | 3.575 | 6.3    | 65    | 613.4     | 1.534 | 11.3   |       |           |       |        |
| 30    | 1424.9    | 3.564 | 9.9    | 66    | 591.5     | 1.480 | 4.2    |       |           |       |        |
| 31    | 1418.2    | 3.548 | 5.9    | 67    | 579.0     | 1.448 | 5.4    |       |           |       |        |
| 32    | 1408.8    | 3.524 | 2.1    | 68    | 565.7     | 1.415 | 6.3    |       |           |       |        |
| 33    | 1393.6    | 3.486 | 1.9    | 69    | 561.0     | 1.403 | 4.3    |       |           |       |        |
| 34    | 1381.4    | 3.456 | 5.9    | 70    | 557.5     | 1.395 | 5.3    |       |           |       |        |
| 35    | 1373.6    | 3.436 | 17.7   | 71    | 550.4     | 1.377 | 5.9    |       |           |       |        |
| 36    | 1365.4    | 3.416 | 5.2    | 72    | 535.9     | 1.341 | 8.2    |       |           |       |        |

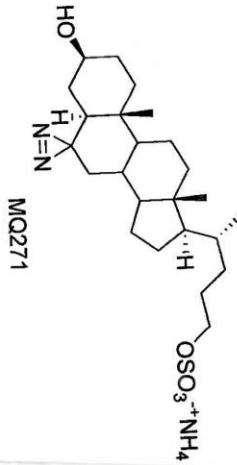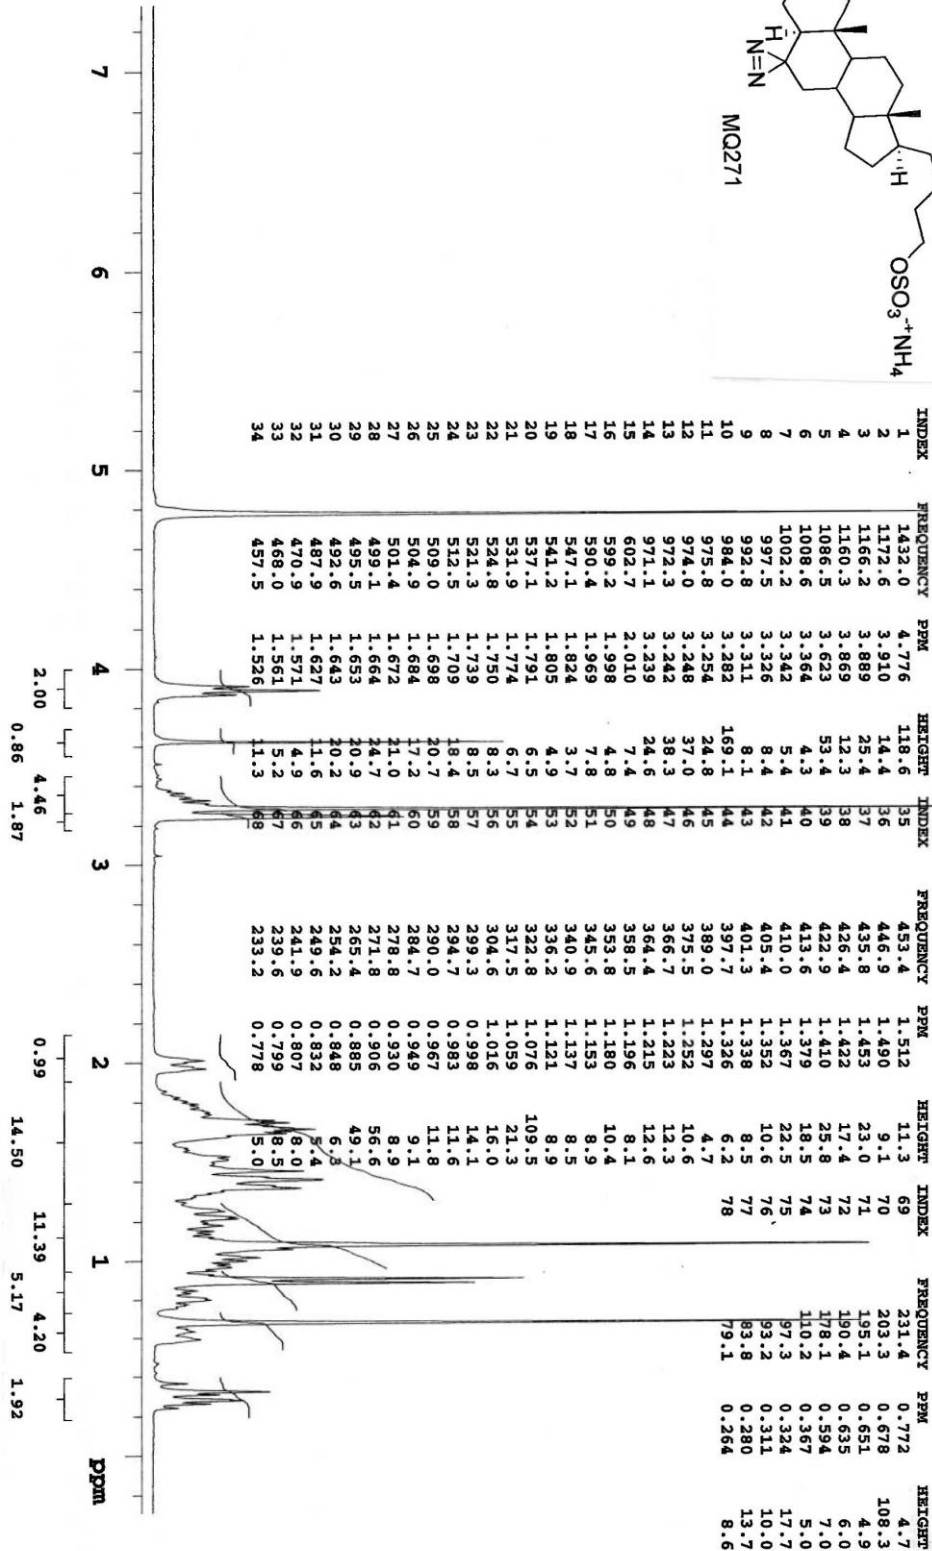

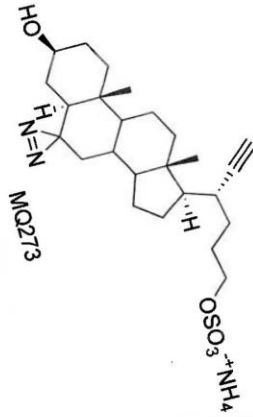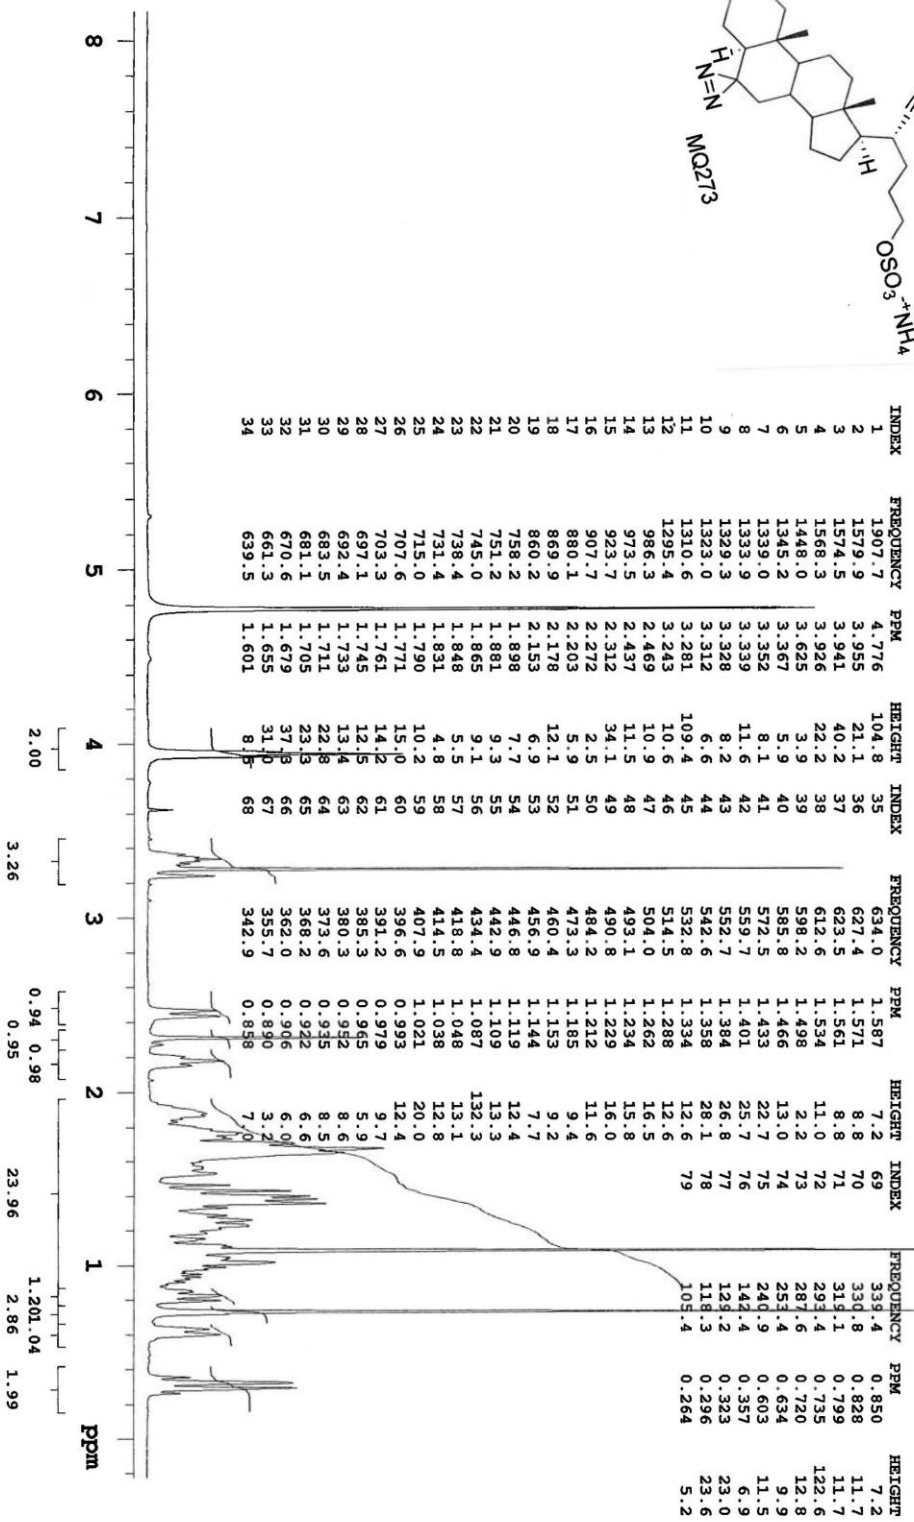

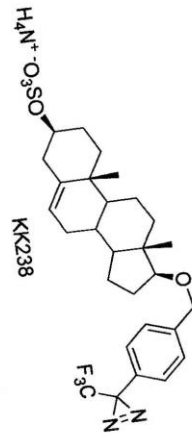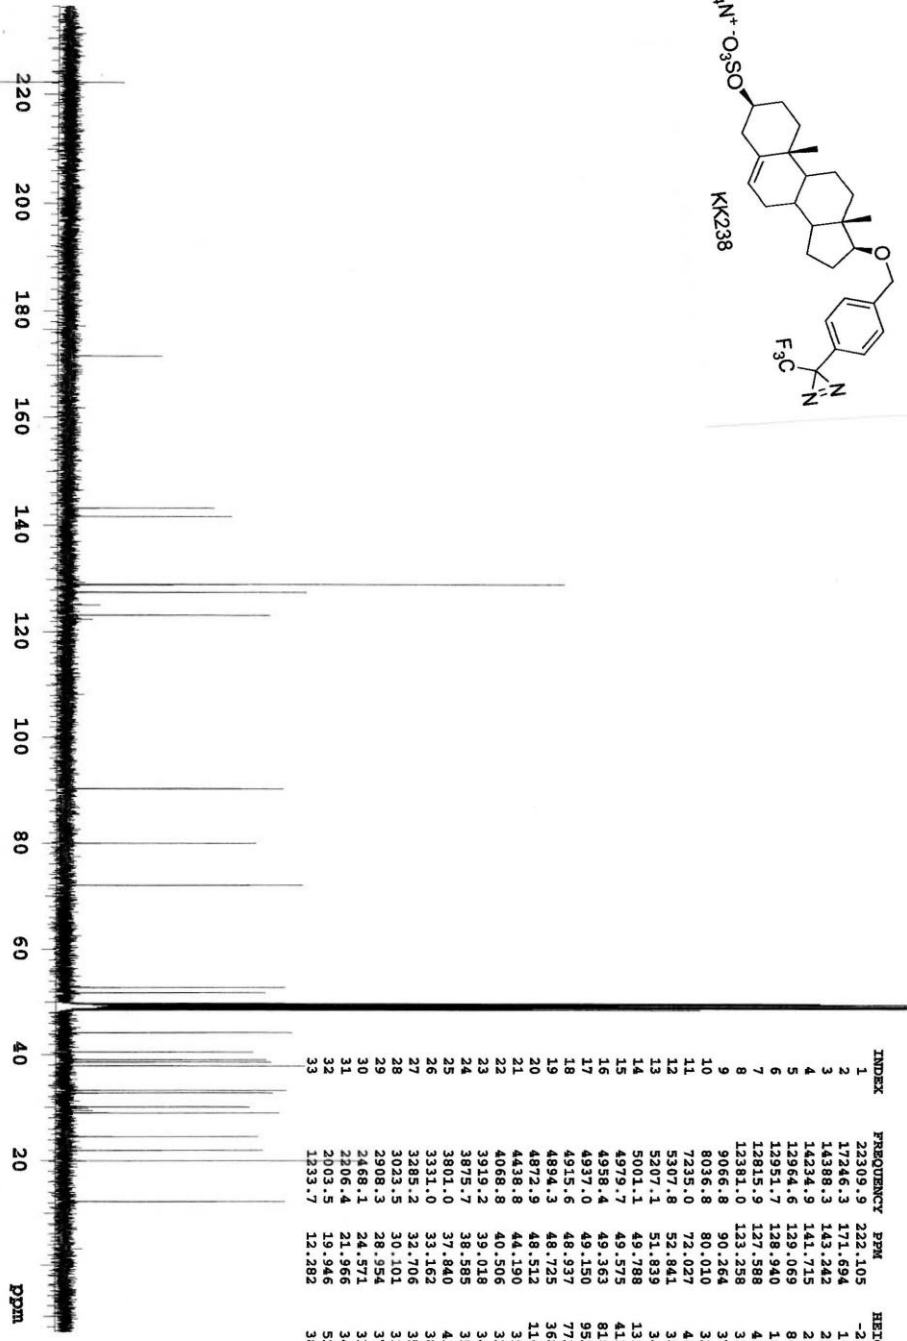

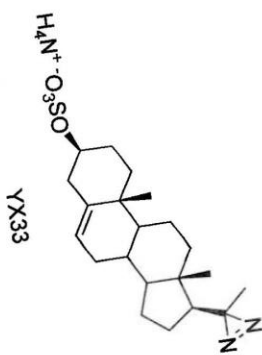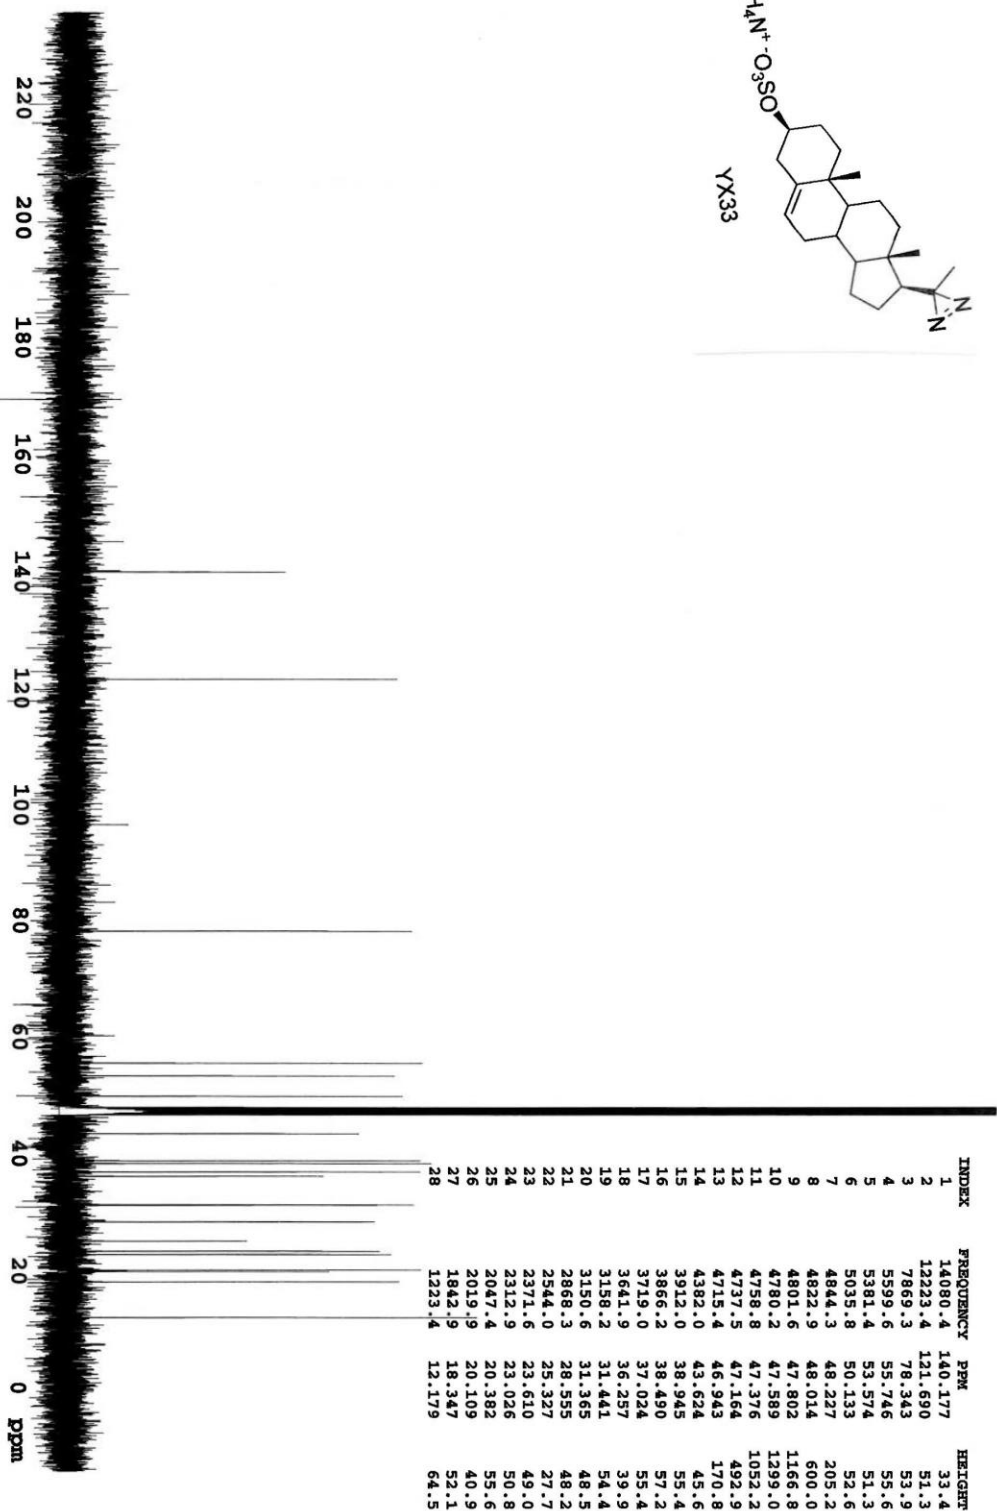

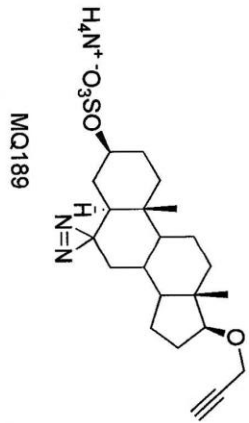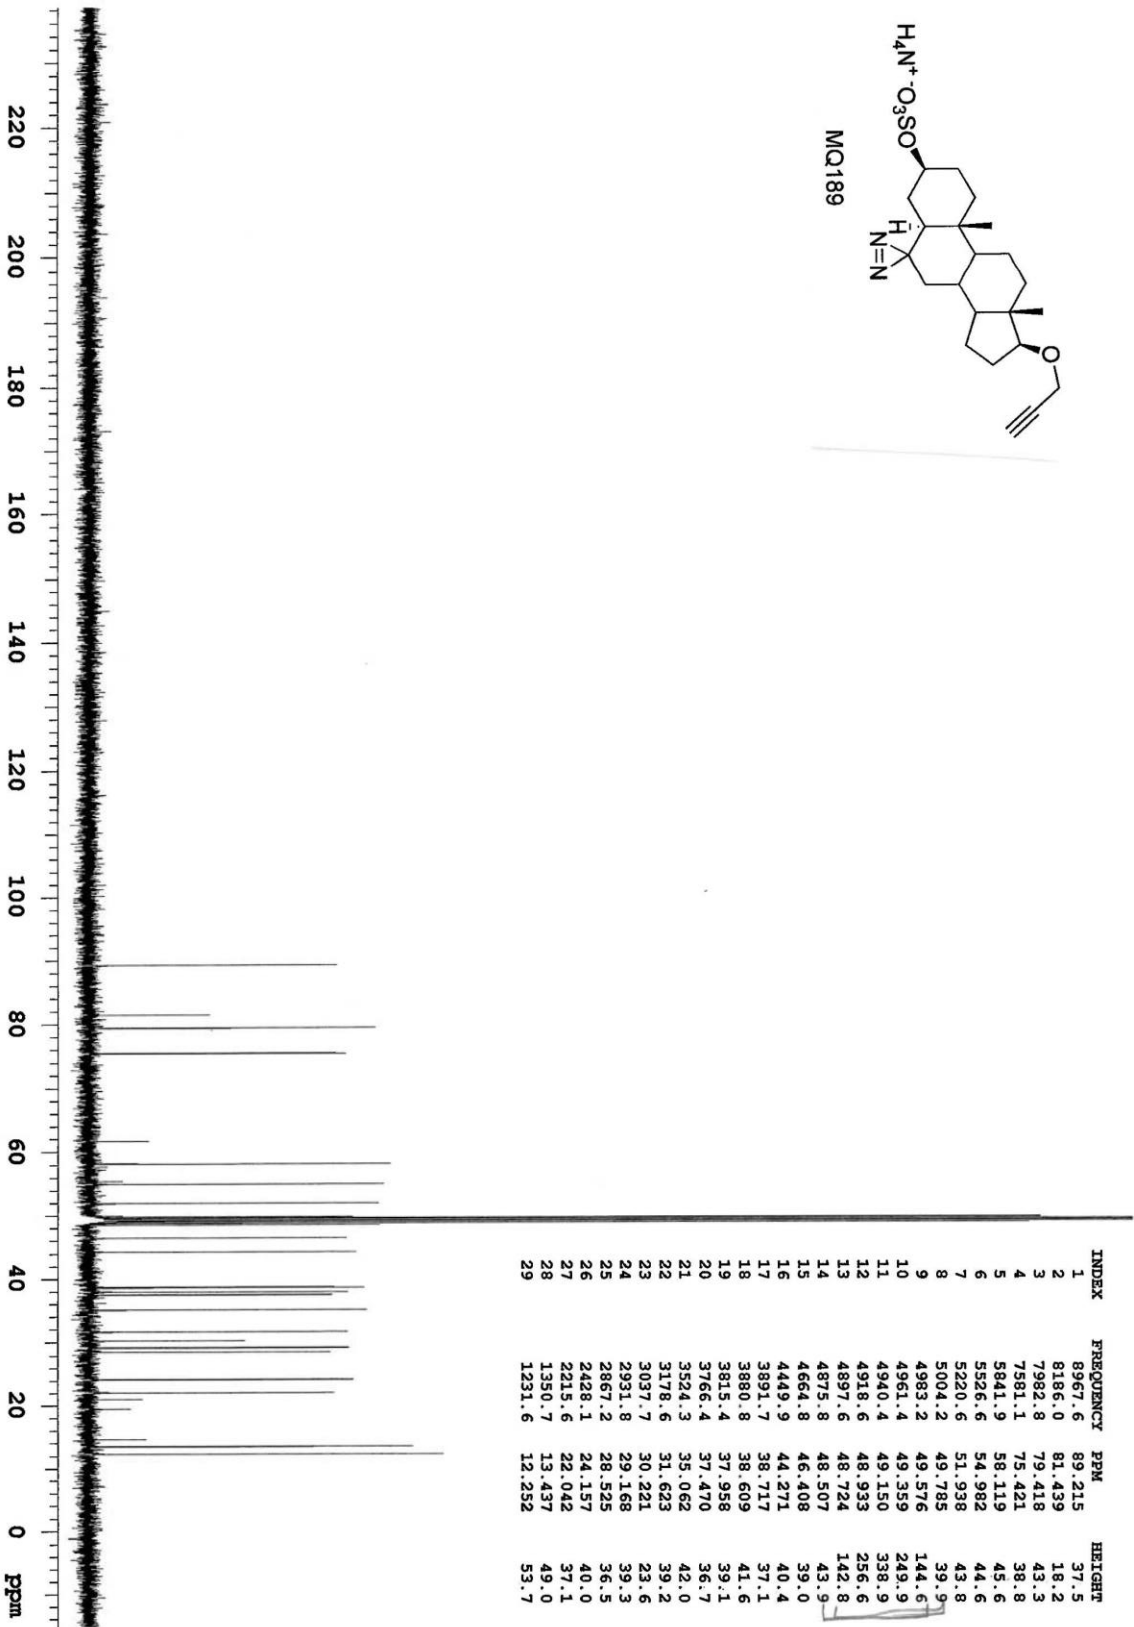

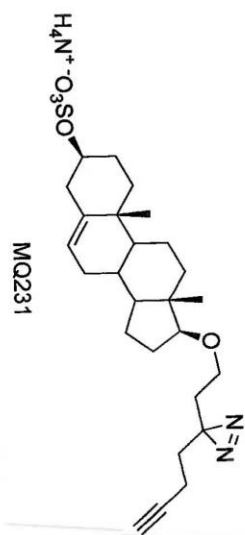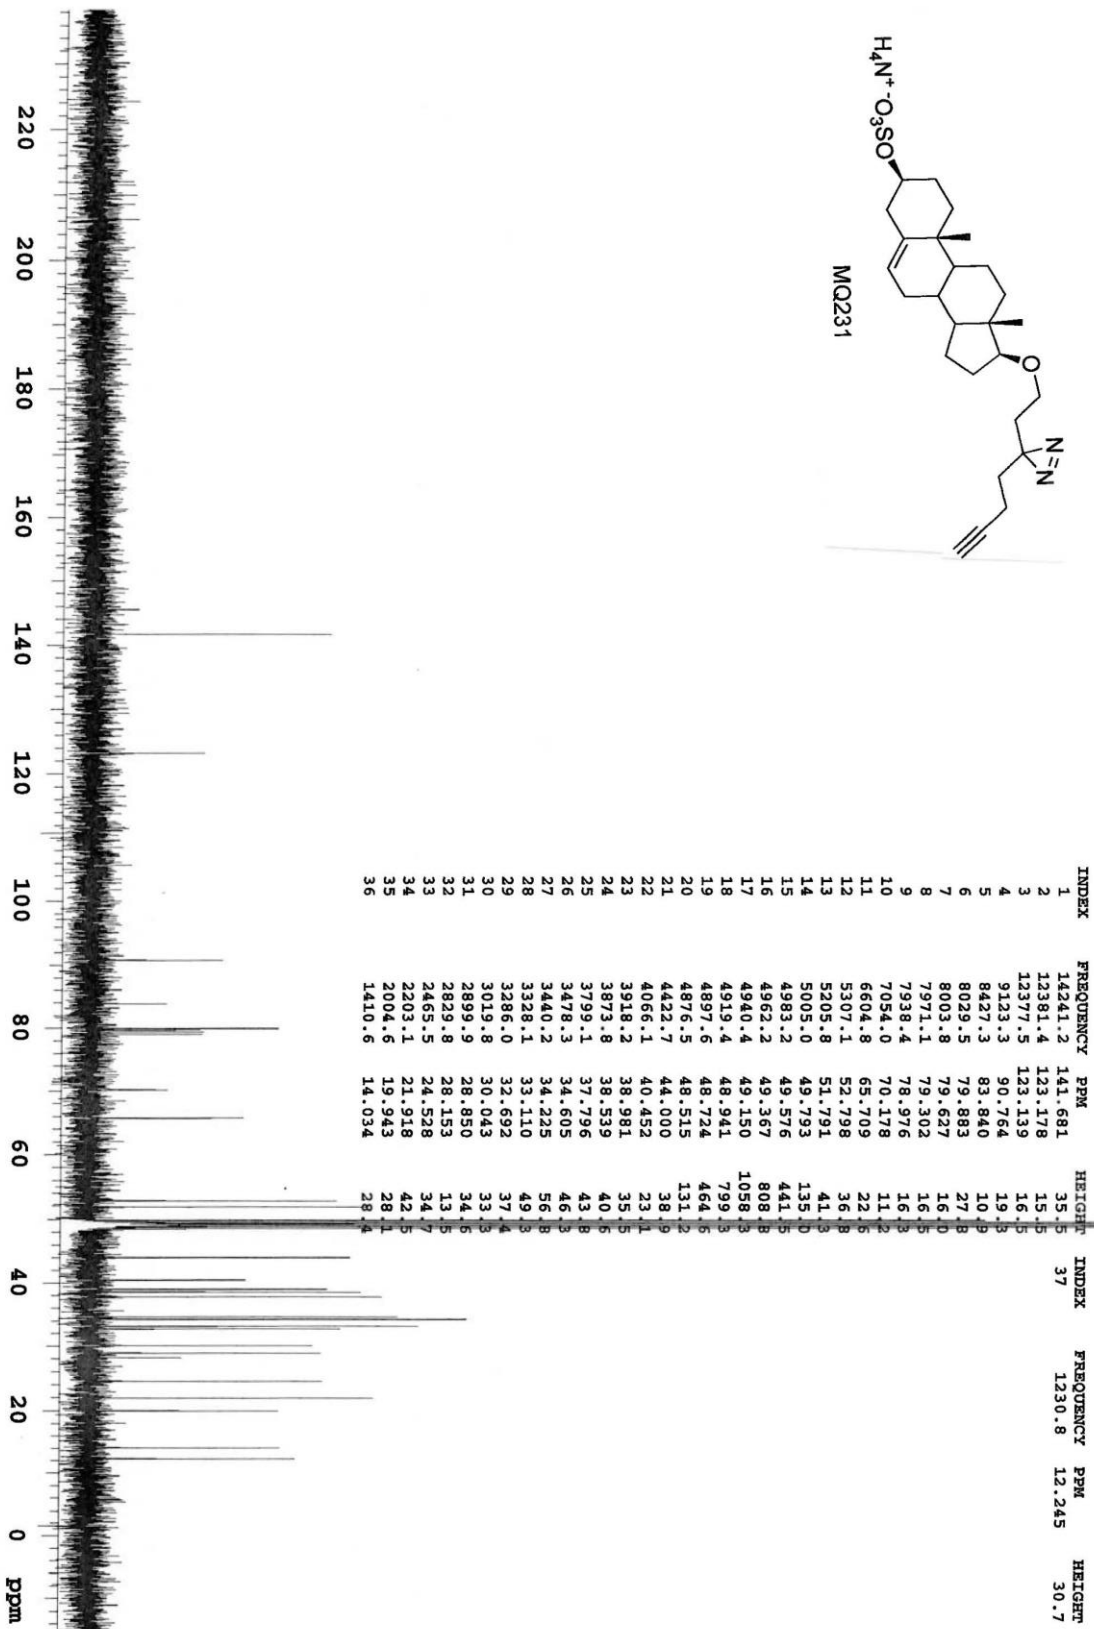

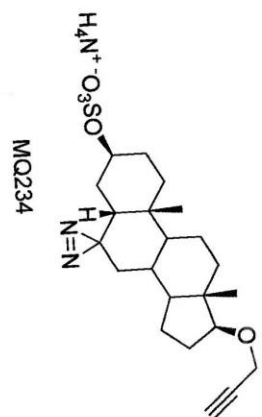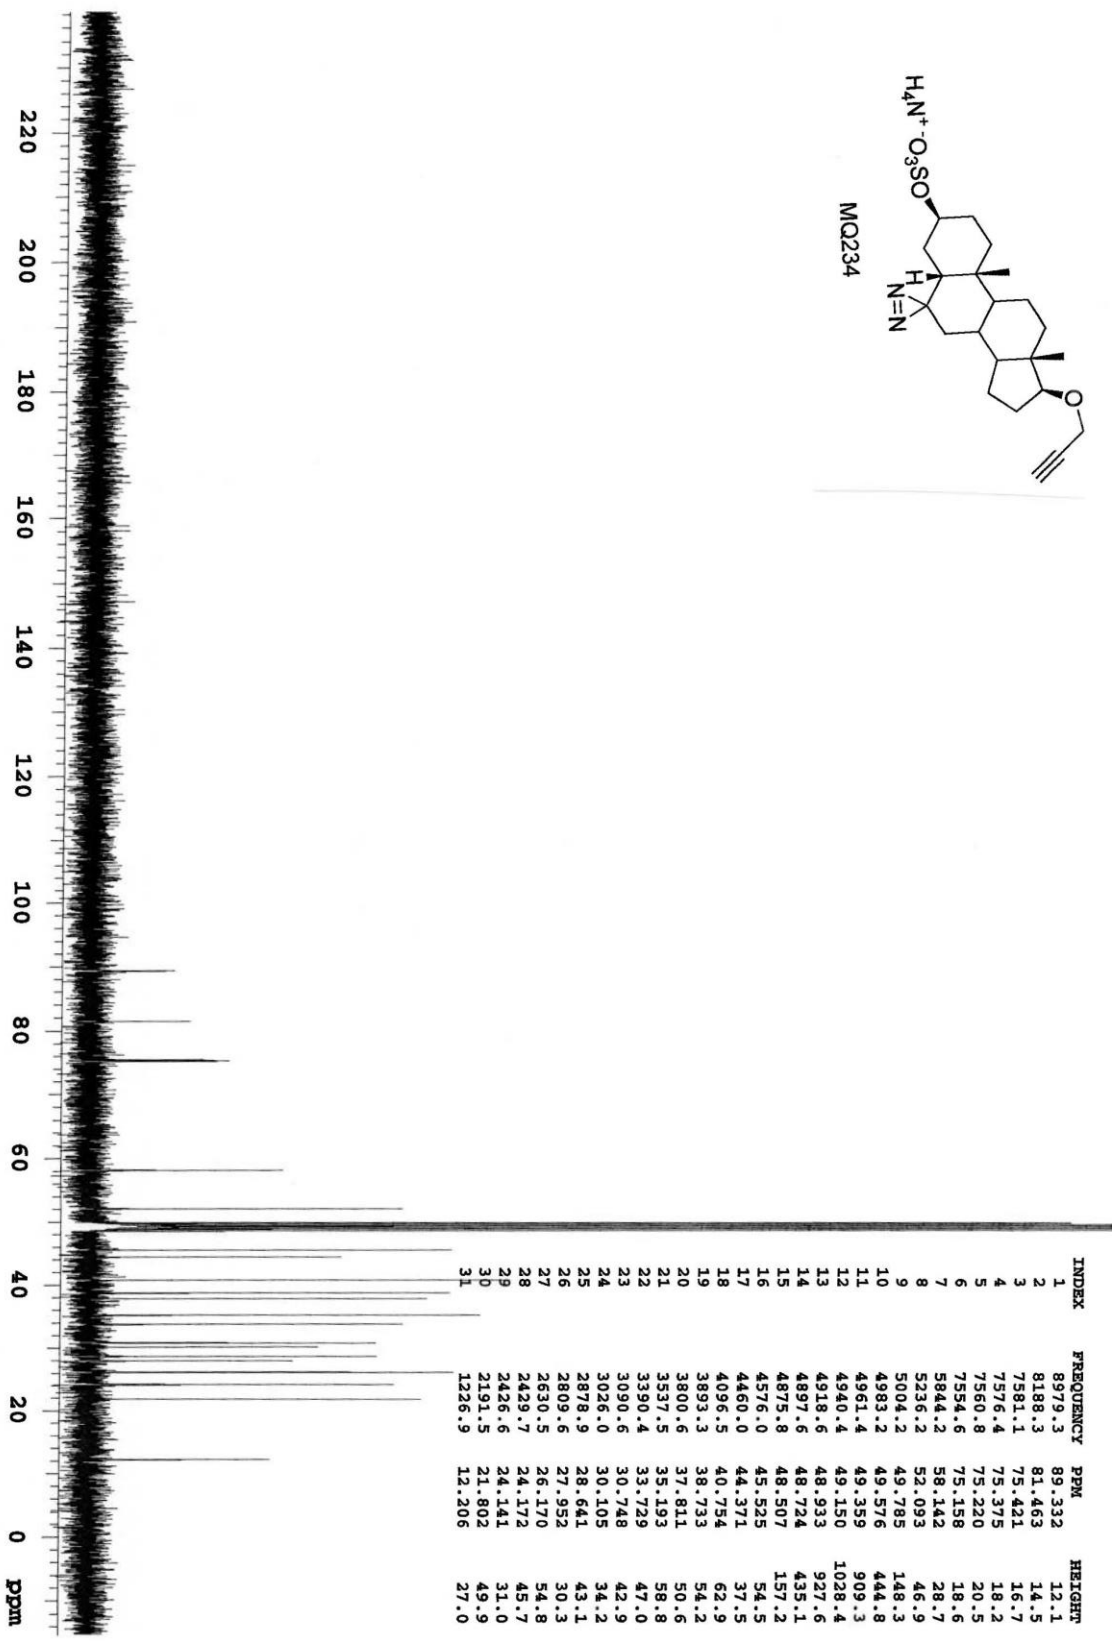



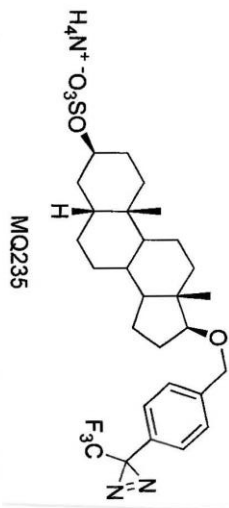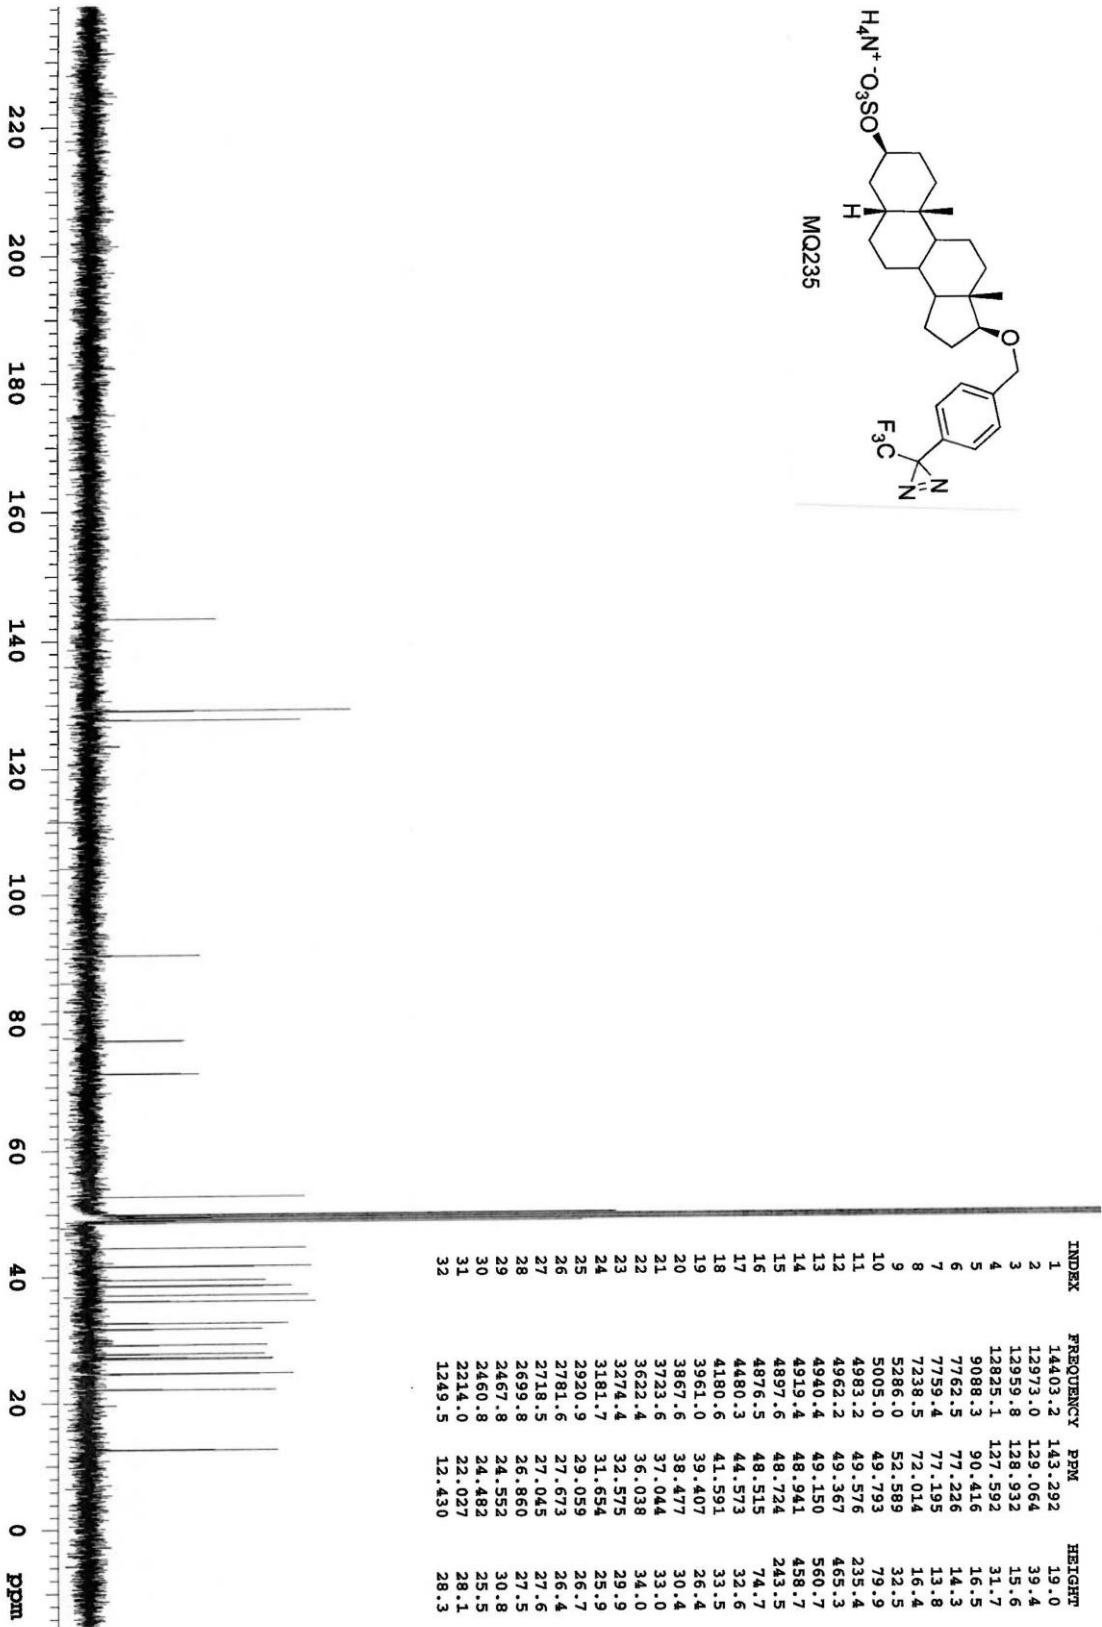

| INDEX | FREQUENCY | PPM     | HEIGHT |
|-------|-----------|---------|--------|
| 1     | 14403.2   | 143.292 | 19.0   |
| 2     | 12973.0   | 129.064 | 39.4   |
| 3     | 12859.8   | 128.932 | 15.6   |
| 4     | 12825.1   | 127.592 | 31.7   |
| 5     | 9088.3    | 90.416  | 16.5   |
| 6     | 7762.5    | 77.226  | 14.3   |
| 7     | 7759.4    | 77.195  | 13.8   |
| 8     | 7238.5    | 72.014  | 16.4   |
| 9     | 5286.0    | 52.589  | 32.5   |
| 10    | 5005.0    | 49.793  | 79.9   |
| 11    | 4983.2    | 49.576  | 233.4  |
| 12    | 4962.2    | 49.367  | 465.3  |
| 13    | 4940.4    | 49.150  | 560.7  |
| 14    | 4919.4    | 48.941  | 458.7  |
| 15    | 4897.6    | 48.724  | 243.5  |
| 16    | 4876.5    | 48.515  | 74.7   |
| 17    | 4480.3    | 44.573  | 32.6   |
| 18    | 4180.6    | 41.591  | 33.5   |
| 19    | 3961.0    | 39.407  | 26.4   |
| 20    | 3867.6    | 38.477  | 30.4   |
| 21    | 3723.6    | 37.044  | 33.0   |
| 22    | 3622.4    | 36.038  | 34.0   |
| 23    | 3274.4    | 32.575  | 29.9   |
| 24    | 3181.7    | 31.654  | 25.9   |
| 25    | 2920.9    | 29.059  | 26.7   |
| 26    | 2781.6    | 27.673  | 26.4   |
| 27    | 2718.5    | 27.045  | 27.6   |
| 28    | 2699.8    | 26.860  | 27.5   |
| 29    | 2467.8    | 24.552  | 30.8   |
| 30    | 2460.8    | 24.482  | 25.5   |
| 31    | 2214.0    | 22.027  | 28.1   |
| 32    | 1249.5    | 12.430  | 28.3   |

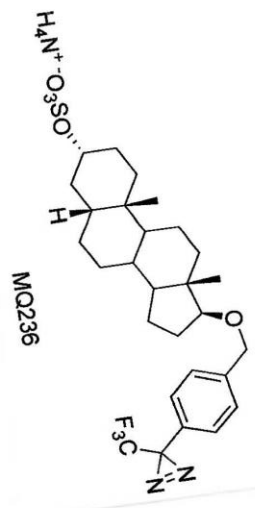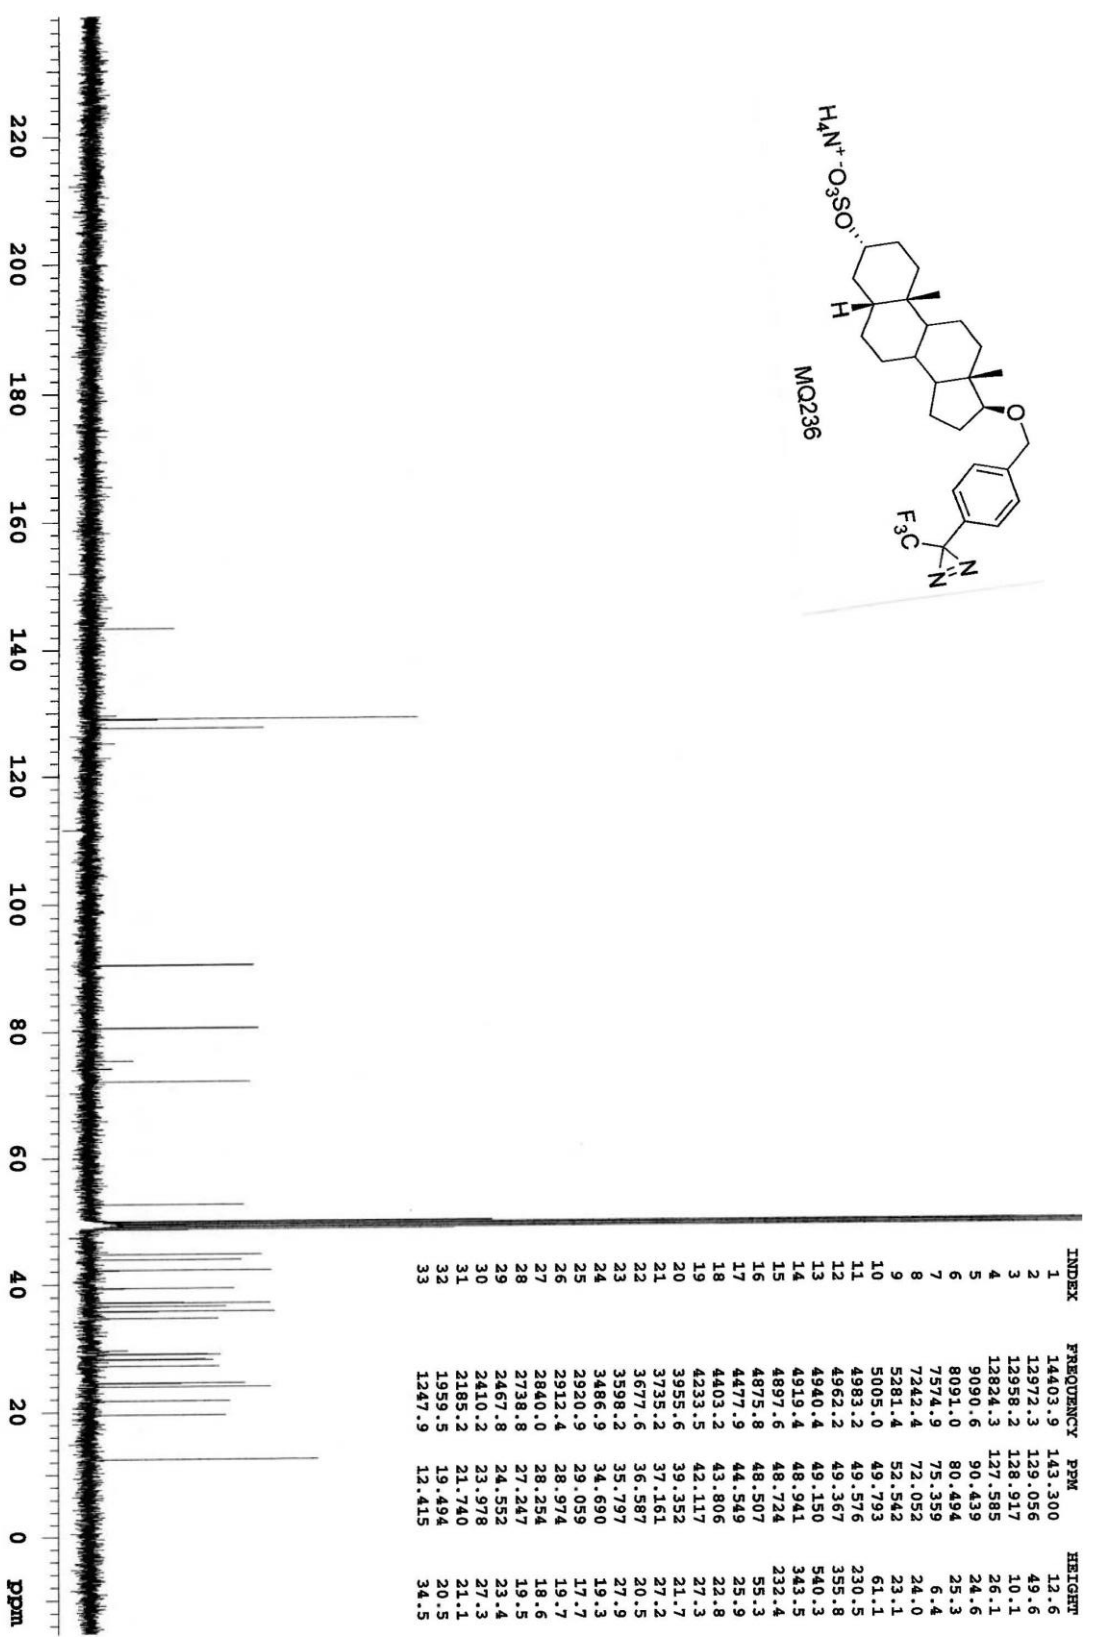

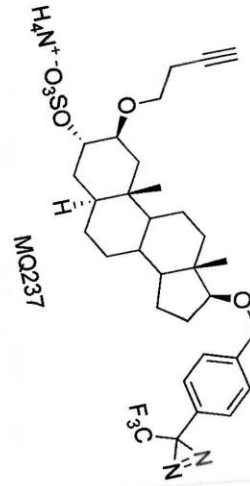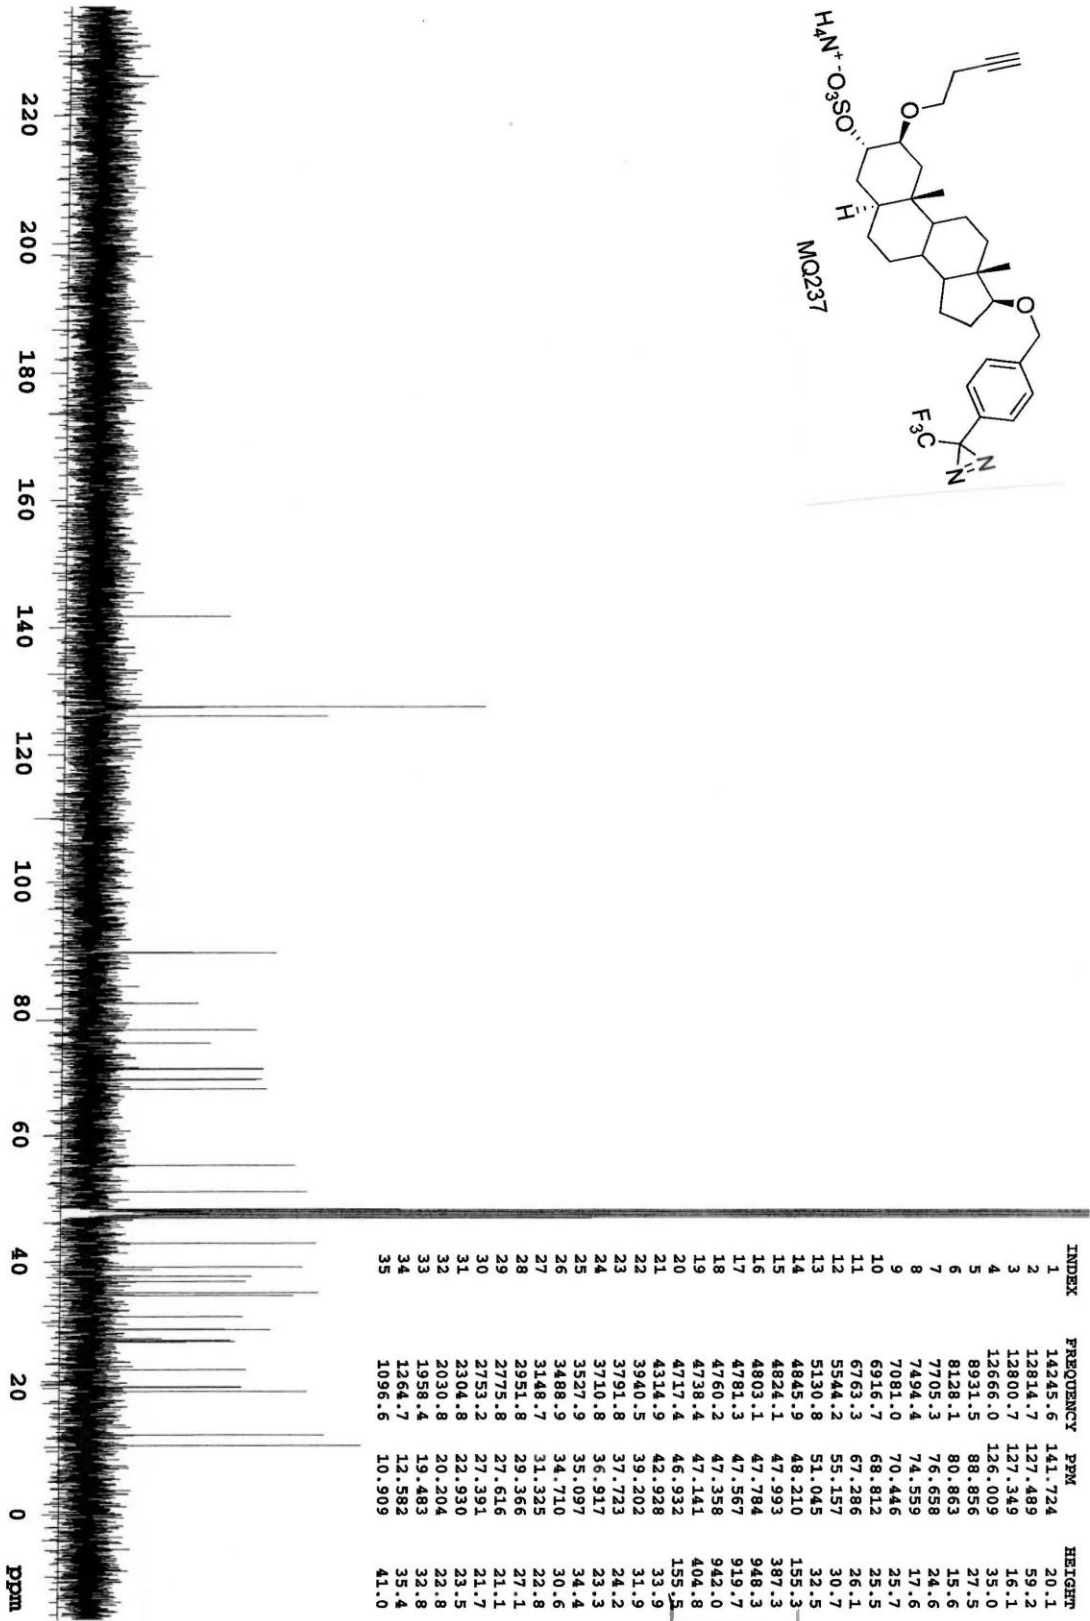

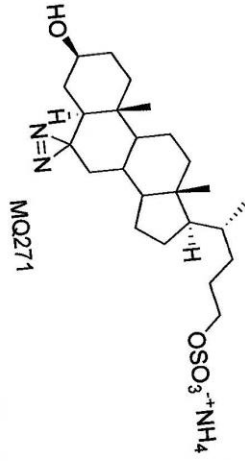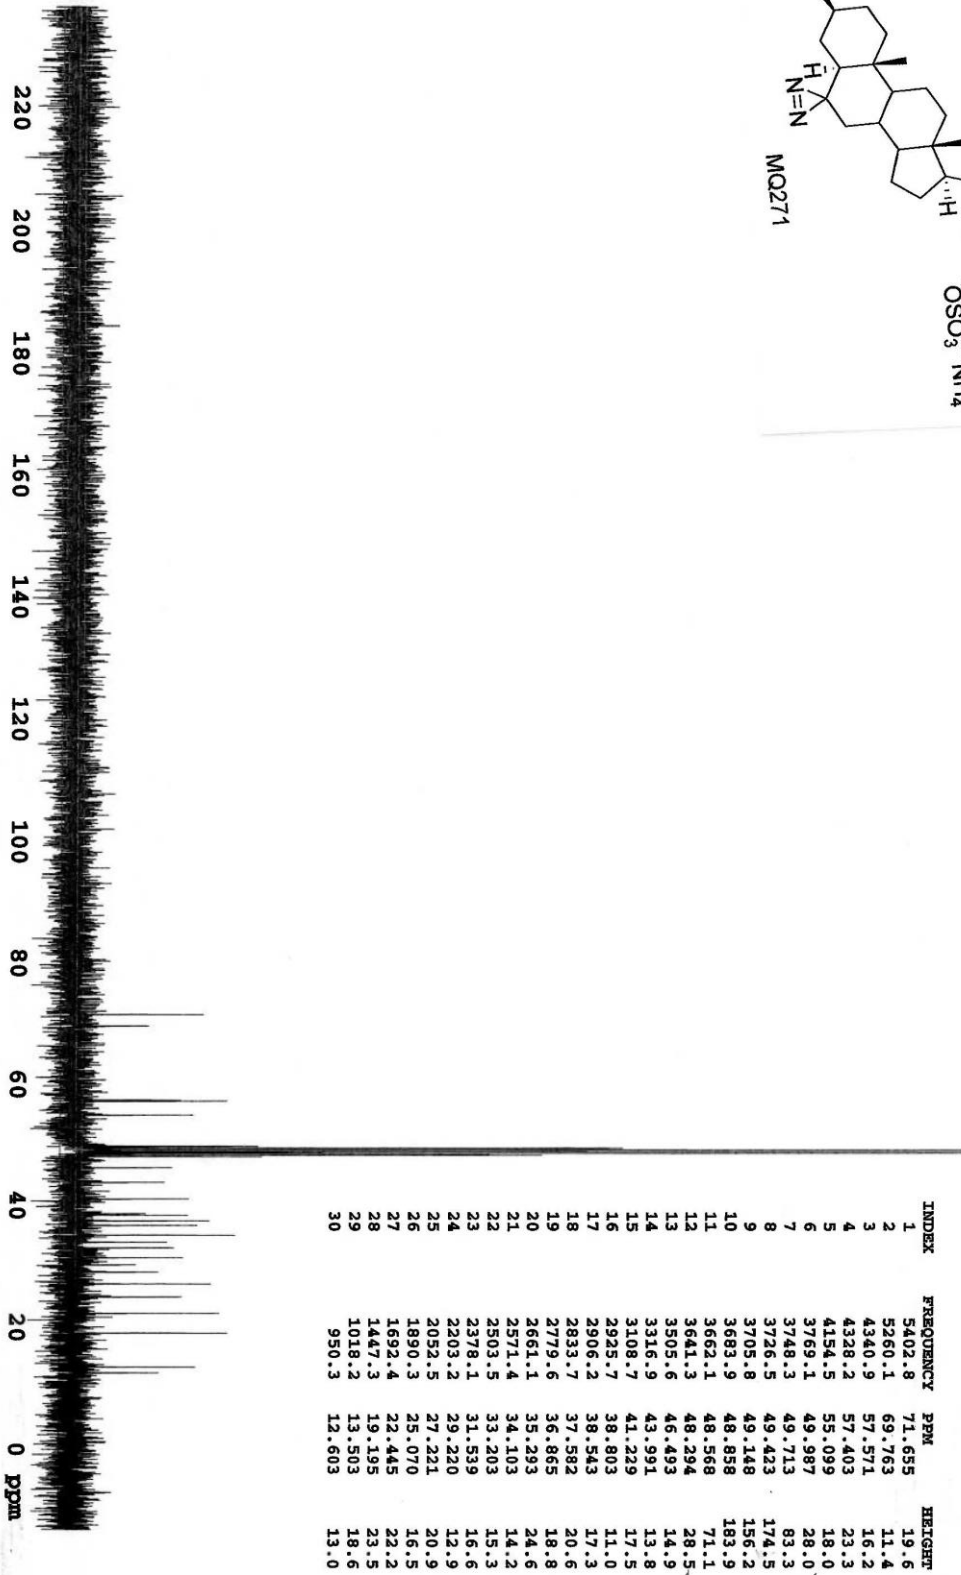

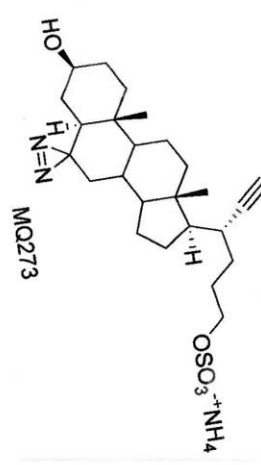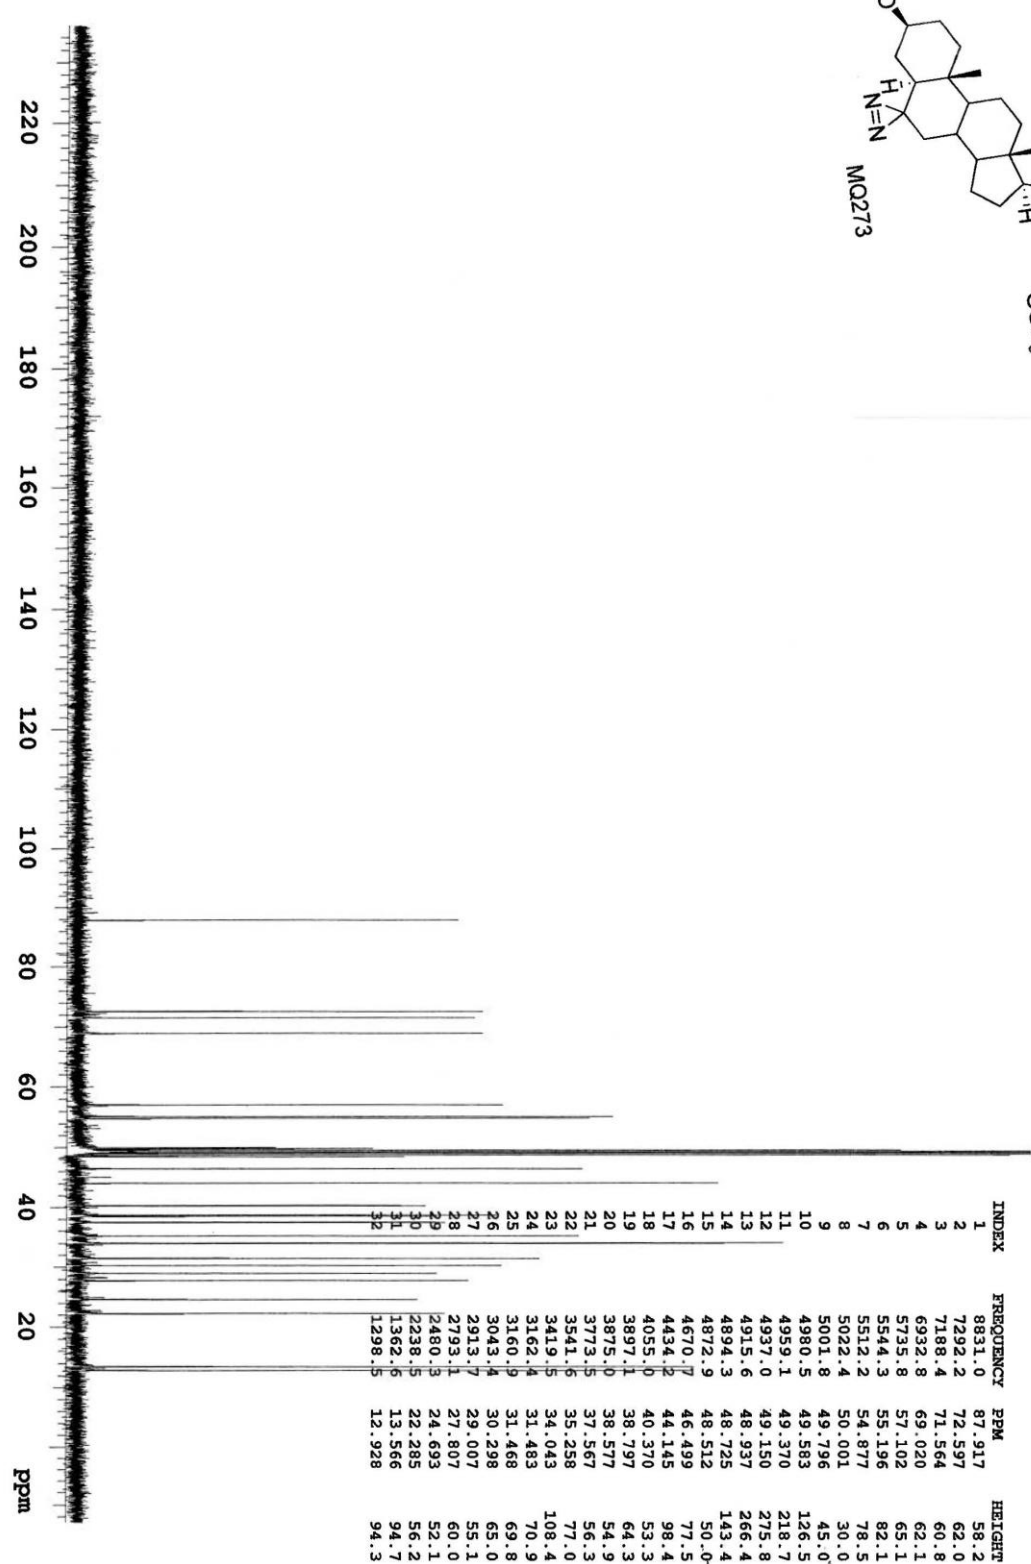

Supplement: RA-014-D4RA07074G-s001.pdf [file RA-014-D4RA07074G-s001.pdf]
